# Supplementary material for: Facile access to 3-sulfonylquinolines via Knoevenagel condensation/aza-Wittig reaction cascade involving ortho -azidobenzaldehydes and β-ketosulfonamides and sulfones
Source: publisher site journal article supplement (doi:10.3762/bjoc.19.60), 2023-06-09
Supplement: Additional file 1 [file 1860-5397-19-60-S1.pdf]

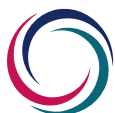

## Supporting Information

for

### **Facile access to 3-sulfonylquinolines via Knoevenagel condensation/aza-Wittig reaction cascade involving *ortho*-azidobenzaldehydes and $\beta$ -ketosulfonamides and sulfones**

Ksenia Malkova, Andrey Bubyrev, Stanislav Kalinin and Dmitry Dar'in

*Beilstein J. Org. Chem.* **2023**, *19*, 800–807. [doi:10.3762/bjoc.19.60](https://doi.org/10.3762/bjoc.19.60)

**General experimental information, X-ray crystallographic data, synthetic procedures, analytical data and NMR spectra for the reported compounds**

## Table of contents

|                                                               |     |
|---------------------------------------------------------------|-----|
| <i>I. Materials and methods</i> .....                         | S2  |
| <i>II. The synthesis of starting materials</i> .....          | S3  |
| <i>III. NMR optimization of reaction conditions</i> .....     | S6  |
| <i>IV. General procedures for the synthesis of 5a–q</i> ..... | S7  |
| <i>V. NMR spectra</i> .....                                   | S12 |
| <i>VI. X-ray crystallographic data</i> .....                  | S31 |
| <i>VII. References</i> .....                                  | S32 |

## ***I. Materials and Methods***

All commercial reagents were used without purification. NMR spectra were recorded using a Bruker Avance III spectrometer in CDCl<sub>3</sub> or DMSO-*d*<sub>6</sub> (<sup>1</sup>H: 400.13 MHz, <sup>13</sup>C: 100.61 MHz and 125.73 MHz, <sup>19</sup>F: 376.50 MHz). All chemical shifts are reported in parts per million (ppm). The residual solvent peak was used as internal standard: CDCl<sub>3</sub> (7.26 for <sup>1</sup>H and 77.16 ppm for <sup>13</sup>C), DMSO-*d*<sub>6</sub> (2.50 for <sup>1</sup>H and 39.52 ppm for <sup>13</sup>C). Standard abbreviations were used in the description of resonances. Coupling constants (*J*) are quoted to the nearest 0.1 Hz. Mass spectra were recorded with a HRMS-ESI-qTOF spectrometer (electrospray ionization mode). Melting points were determined with a melting point apparatus Stuart SMP10 in open capillary tubes. Single crystal X-ray data were obtained using an Agilent Technologies SuperNova Atlas diffractometer at a temperature of 100 K. Analytical thin layer chromatography was carried out on UV-254 silica gel plates using appropriate eluents. Compounds were visualized with short wavelength UV light. Column chromatography was performed using silica gel Merk grade 60 (0.040–0.063 mm) 230–400 mesh.

## II. The synthesis of starting materials

### Azidoaldehydes 1

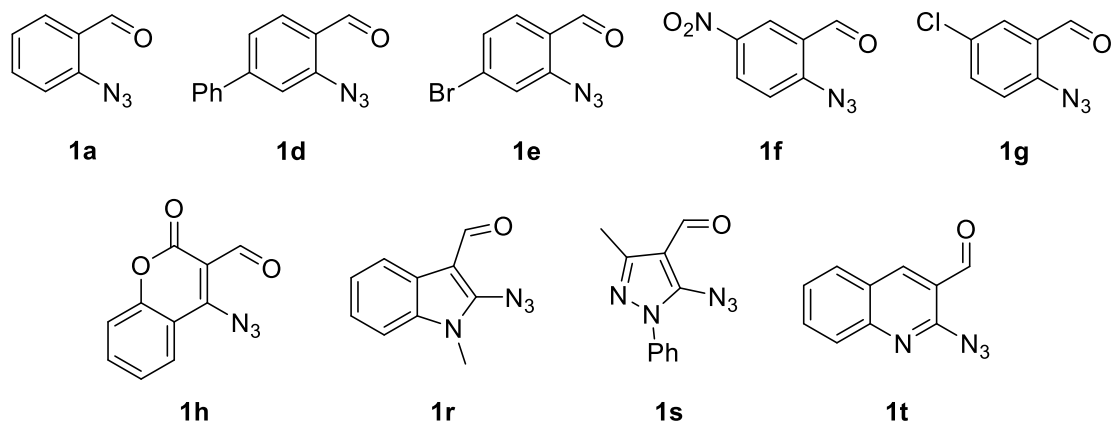

Azidoaldehydes **1a,d–g,r,t** were synthesized as described previously [1].

4-Azido-2-oxo-2H-chromene-3-carbaldehyde (**1h**) was prepared from 4-chloro-2-oxo-2H-chromene-3-carbaldehyde according to a literature technique [2].

5-Azido-3-methyl-1-phenyl-1H-pyrazole-4-carboxaldehyde (**1s**) was synthesized from 5-chloro-3-methyl-1-phenyl-1H-pyrazole-4-carboxaldehyde as described in the literature [3].

### Ketosulfonamides and ketosulfones 2

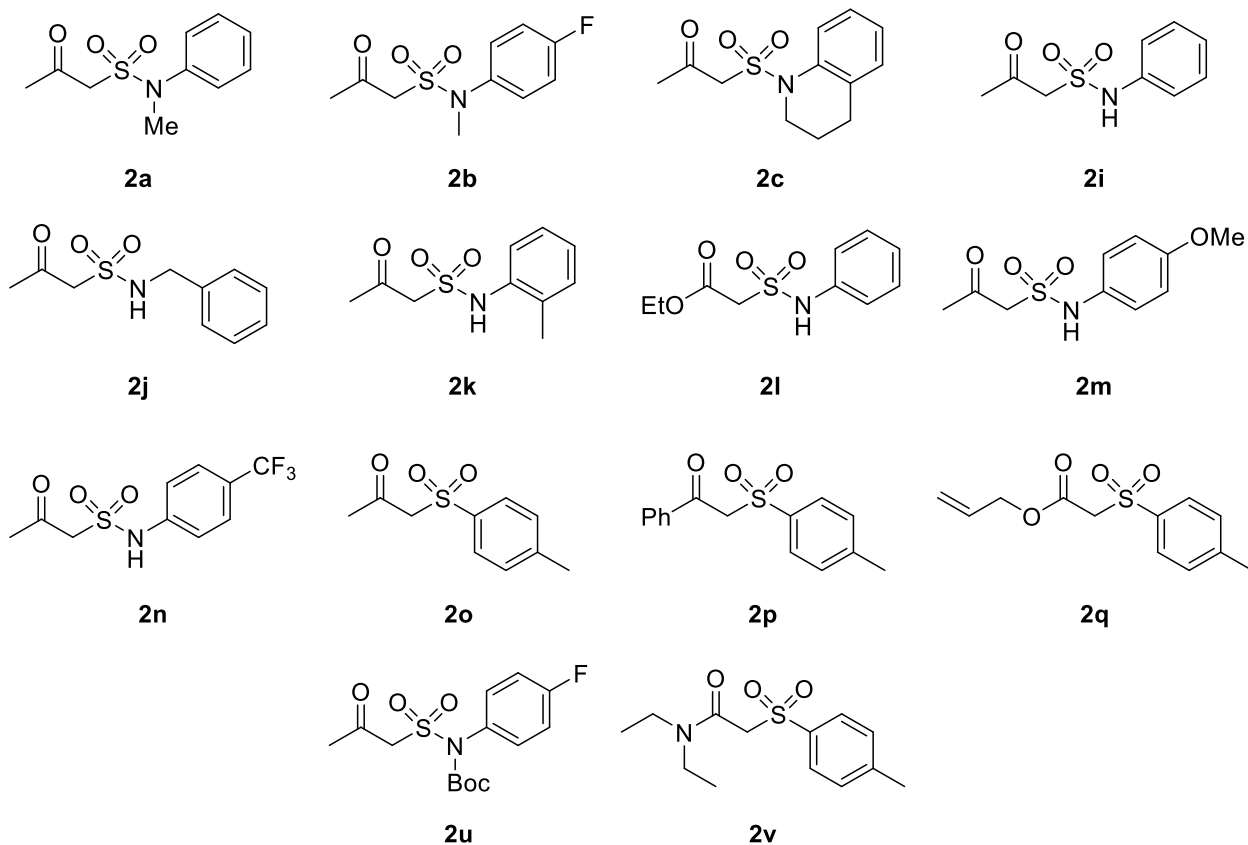

Ketosulfonamides **2a–c,i–n** were synthesized as described previously [4,5].

Reagents **2o–q** were prepared according to a literature technique [6].

*tert*-Butyl (4-fluorophenyl)((2-oxopropyl)sulfonyl)carbamate (**2u**) was prepared from *N*-(4-fluorophenyl)-2-oxopropane-1-sulfonamide by reaction with the anhydride Boc<sub>2</sub>O in the presence of DMAP according to the literature [7].

*N,N*-Diethyl-2-tosylacetamide (**2v**) was synthesized as described in the literature [8].

*N*-Methyl-2-oxo-*N*-phenylpropane-1-sulfonamide (**2a**)

<sup>1</sup>H NMR (400 MHz, CDCl<sub>3</sub>) δ 7.45 – 7.35 (m, 4H), 7.33 – 7.28 (m, 1H), 4.00 (s, 2H), 3.32 (s, 3H), 2.36 (s, 3H). <sup>13</sup>C{<sup>1</sup>H} NMR (101 MHz, CDCl<sub>3</sub>) δ 197.6, 140.6, 129.5, 128.0, 127.3, 60.8, 39.4, 31.3. HRMS (ESI) m/z: [M+Na]<sup>+</sup> Calcd for C<sub>10</sub>H<sub>13</sub>NNaO<sub>3</sub>S [M+Na]<sup>+</sup> 250.0508; Found 250.0503.

*N*-(4-Fluorophenyl)-*N*-methyl-2-oxopropane-1-sulfonamide (**2b**)

<sup>1</sup>H NMR (400 MHz, CDCl<sub>3</sub>) δ 7.47 – 7.38 (m, 2H), 7.13 – 7.03 (m, 2H), 4.00 (s, 2H), 3.31 (s, 3H), 2.40 (s, 3H). <sup>13</sup>C{<sup>1</sup>H} NMR (101 MHz, CDCl<sub>3</sub>) δ 197.8, 162.0 (d, C-F, <sup>1</sup>J<sub>C-F</sub> = 248.6 Hz), 136.6 (d, C-F, <sup>4</sup>J<sub>C-F</sub> = 3.2 Hz), 129.6 (d, C-F, <sup>3</sup>J<sub>C-F</sub> = 8.8 Hz), 116.5 (d, C-F, <sup>2</sup>J<sub>C-F</sub> = 22.7 Hz), 60.9, 39.9, 31.5. <sup>19</sup>F{<sup>1</sup>H} NMR (376 MHz, CDCl<sub>3</sub>) δ -112.9. HRMS (ESI) m/z: [M+Na]<sup>+</sup> Calcd for C<sub>10</sub>H<sub>12</sub>FNNaO<sub>3</sub>S [M+Na]<sup>+</sup> 268.0414; Found 268.0413.

*1*-((3,4-Dihydroquinolin-1(2H)-yl)sulfonyl)propan-2-one (**2c**)

<sup>1</sup>H NMR (400 MHz, CDCl<sub>3</sub>) δ 7.66 (dd, *J* = 8.2, 1.1 Hz, 1H), 7.21 – 7.03 (m, 3H), 4.04 (s, 2H), 3.86 – 3.74 (m, 2H), 2.84 (t, *J* = 6.6 Hz, 2H), 2.35 (s, 3H), 2.01 (p, *J* = 6.6 Hz, 2H). <sup>13</sup>C{<sup>1</sup>H} NMR (101 MHz, CDCl<sub>3</sub>) δ 196.5, 136.3, 130.0, 129.9, 127.0, 125.1, 122.5, 62.9, 47.2, 31.1, 27.1, 22.7. HRMS (ESI) m/z: [M+Na]<sup>+</sup> Calcd for C<sub>12</sub>H<sub>15</sub>NNaO<sub>3</sub>S [M+Na]<sup>+</sup> 276.0665; Found 276.0659.

2-Oxo-*N*-(*o*-tolyl)propane-1-sulfonamide (**2k**)

<sup>1</sup>H NMR (400 MHz, CDCl<sub>3</sub>) δ 7.45 (dd, *J* = 7.8, 1.5 Hz, 1H), 7.25 – 7.12 (m, 3H), 6.66 (s, 1H), 4.13 (s, 2H), 2.36 (s, 6H). <sup>13</sup>C{<sup>1</sup>H} NMR (101 MHz, CDCl<sub>3</sub>) δ 197.9, 134.3, 132.3, 131.6, 127.3, 126.8, 123.2, 61.0, 31.6, 18.1. HRMS (ESI) m/z: [M-H]<sup>-</sup> Calcd for C<sub>10</sub>H<sub>12</sub>NO<sub>3</sub>S [M-H]<sup>-</sup> 226.0543; Found 226.0550.

2-Oxo-*N*-(4-(trifluoromethyl)phenyl)propane-1-sulfonamide (**2n**)

<sup>1</sup>H NMR (400 MHz, CDCl<sub>3</sub>) δ 7.62 (d, *J* = 8.2 Hz, 2H), 7.40 (d, *J* = 8.2 Hz, 2H), 7.22 (s, 1H), 4.09 (s, 2H), 2.36 (s, 3H). <sup>13</sup>C{<sup>1</sup>H} NMR (101 MHz, CDCl<sub>3</sub>) δ 198.1, 139.5, 128.2 (q, C-F, <sup>2</sup>J<sub>C-F</sub> = 33.1 Hz), 127.1 (q, C-F, <sup>3</sup>J<sub>C-F</sub> = 3.7 Hz), 123.9 (q, C-F, <sup>1</sup>J<sub>C-F</sub> = 271.6 Hz), 121.5, 59.9, 31.8. <sup>19</sup>F{<sup>1</sup>H} NMR (376 MHz, CDCl<sub>3</sub>) δ -62.4. HRMS (ESI) m/z: [M-H]<sup>-</sup> Calcd for C<sub>10</sub>H<sub>9</sub>F<sub>3</sub>NO<sub>3</sub>S [M-H]<sup>-</sup> 280.0261; Found 280.0266.

*Allyl 2-tosylacetate (2q)*

$^1\text{H}$  NMR (400 MHz,  $\text{CDCl}_3$ )  $\delta$  7.66 (dd,  $J = 8.2, 1.1$  Hz, 1H), 7.21 – 7.03 (m, 3H), 4.04 (s, 2H), 3.86 – 3.74 (m, 2H), 2.84 (t,  $J = 6.6$  Hz, 2H), 2.35 (s, 3H), 2.01 (p,  $J = 6.6$  Hz, 2H).  $^{13}\text{C}\{^1\text{H}\}$  NMR (101 MHz,  $\text{CDCl}_3$ )  $\delta$  196.5, 136.3, 130.0, 129.9, 127.0, 125.1, 122.5, 62.9, 47.2, 31.1, 27.1, 22.7. HRMS (ESI)  $m/z$ :  $[\text{M}+\text{Na}]^+$  Calcd for  $\text{C}_{12}\text{H}_{14}\text{NaO}_4\text{S}$   $[\text{M}+\text{Na}]^+$  277.0505; Found 277.0507.

### ***III. NMR optimization of reaction conditions***

A mixture of 2-azidobenzaldehyde (**1a**), *N*-methyl-2-oxo-*N*-phenylpropane-1-sulfonamide (**2a**), and PPh<sub>3</sub> in MeCN was stirred for a few minutes. To the resulting solution a base was added. The solution was stirred for 6 h/overnight. A small portion of the solution was transported into a flask and evaporated in vacuo. The standard solution of quinoline in CDCl<sub>3</sub> was added to the oily residue. The resulting solution was transferred into an NMR tube.

#### IV. General procedures for the synthesis of 5a–q

##### General procedure for the synthesis of quinoline-3-sulfonamides 5a–g, chromenopyridine-3-sulfonamide 5h and quinoline-3-sulfones 5o–q (GP1)

A mixture of azidoaldehyde **1** (0.625 mmol, 1.25 equiv), ketosulfonamide or ketosulfone **2** (0.5 mmol, 1 equiv), and PPh<sub>3</sub> (197 mg, 0.75 mmol, 1.5 equiv) in 6.5 mL of MeCN was stirred for a few minutes. To the resulting solution piperidine (61.7 μL, 0.625 mmol, 1.25 equiv) was added. The solution was stirred at 80 °C overnight. The mixture was adsorbed onto silica and chromatographed with a hexane/ethyl acetate system using gradient elution to give desired product **5a–g** or **5o,q**.

In case of **5h**, a mixture of azidoaldehyde **1h** (67 mg, 0.313 mmol, 1.25 equiv), ketosulfonamide **2a** (57 mg, 0.25 mmol, 1 equiv), and PPh<sub>3</sub> (98 mg, 0.375 mmol, 1.5 equiv) in 3.25 ml of MeCN was stirred for a few minutes. To the resulting solution piperidine (30.9 μL, 0.313 mmol, 1.25 equiv) was added. Further operations were carried out as described above.

In case of **5p**, after stirring overnight solvent was removed in vacuo. The crude solid product was recrystallized from hexane/benzene/DCM (2:2:3, 7 mL) system to give pure compound **5p**.

##### General procedure for the synthesis of quinoline-3-sulfonamides 5i–n (GP2)

A mixture of azidoaldehyde **1** (0.625 mmol, 1.56 equiv), ketosulfonamide **2** (0.4 mmol, 1 equiv), and PPh<sub>3</sub> (197 mg, 0.75 mmol, 1.88 equiv) in 6.5 ml of MeCN was stirred for a few minutes. To the resulting solution piperidine (61.7 μL, 0.625 mmol, 1.56 equiv) was added. The solution was stirred at 80 °C overnight. The mixture was adsorbed onto silica and chromatographed with a hexane/ethyl acetate system using gradient elution to give desired product **5i–n**.

##### *N*,2-Dimethyl-*N*-phenylquinoline-3-sulfonamide (**5a**)

Prepared from 2-azidobenzaldehyde (**1a**) and *N*-methyl-2-oxo-*N*-phenylpropane-1-sulfonamide **2a** according to **GP1**. Eluent: hexane/ethyl acetate from 100:0 to 75:25. Yield: 145 mg (93%). Light yellow powder; mp 110-111°C. <sup>1</sup>H NMR (400 MHz, CDCl<sub>3</sub>) δ 8.65 (s, 1H), 8.04 (dd, *J* = 8.8, 1.2 Hz, 1H), 7.90 – 7.79 (m, 2H), 7.58 (ddd, *J* = 8.2, 7.1, 1.2 Hz, 1H), 7.35 – 7.23 (m, 3H), 7.22 – 7.17 (m, 2H), 3.31 (s, 3H), 2.70 (s, 3H). <sup>13</sup>C{<sup>1</sup>H} NMR (101 MHz, CDCl<sub>3</sub>) δ 155.9, 148.8, 141.1, 140.3, 132.6, 130.6, 129.4, 128.8, 128.7, 127.9, 127.4, 127.0, 125.4, 38.8, 24.7. HRMS (ESI) *m/z*: [M+Na]<sup>+</sup> Calcd for C<sub>17</sub>H<sub>16</sub>N<sub>2</sub>NaO<sub>2</sub>S [M+Na]<sup>+</sup> 335.0825; Found 335.0825.

##### *N*-(4-Fluorophenyl)-*N*,2-dimethylquinoline-3-sulfonamide (**5b**)

Prepared from 2-azidobenzaldehyde (**1a**) and *N*-(4-fluorophenyl)-*N*-methyl-2-oxopropane-1-sulfonamide (**2b**) according to **GP1**. Eluent: hexane/ethyl acetate from 100:0 to 75:25. Yield: 159 mg (96%). Light yellow powder; mp 93-94°C. <sup>1</sup>H NMR (400 MHz, CDCl<sub>3</sub>) δ 8.63 (s, 1H), 8.11 – 8.01 (m, 1H), 7.87 – 7.81 (m, 2H), 7.59 (ddd, *J* = 8.2, 6.9, 1.2 Hz, 1H), 7.20 – 7.13 (m, 2H), 7.02 – 6.94 (m, 2H), 3.28 (s, 3H), 2.75 (s, 3H). <sup>13</sup>C{<sup>1</sup>H} NMR (101 MHz, CDCl<sub>3</sub>) δ 161.9 (d, C-F, <sup>1</sup>*J*<sub>C-F</sub> = 248.6 Hz), 155.8, 148.9, 140.5, 137.0 (d, <sup>4</sup>*J*<sub>C-F</sub> = 3.2 Hz), 132.7, 130.4, 129.2 (d, C-F, <sup>3</sup>*J*<sub>C-F</sub> = 8.6 Hz), 128.8, 128.7, 127.5, 125.4, 116.4 (d, C-F, <sup>2</sup>*J*<sub>C-F</sub> = 22.8 Hz), 39.1, 24.8. <sup>19</sup>F{<sup>1</sup>H} NMR (376 MHz, CDCl<sub>3</sub>) δ



-112.9. HRMS (ESI)  $m/z$ :  $[M+Na]^+$  Calcd for  $C_{17}H_{15}FN_2NaO_2S$   $[M+Na]^+$  353.0730; Found 353.0726.

*3-((3,4-Dihydroquinolin-1(2H)-yl)sulfonyl)-2-methylquinoline (5c)*

Prepared from 2-azidobenzaldehyde (**1a**) and 1-((3,4-dihydroquinolin-1(2H)-yl)sulfonyl)propan-2-one (**2c**) according to **GP1**. Eluent: hexane/ethyl acetate from 100:0 to 75:25. Yield: 111 mg (66%). Light orange oil.  $^1H$  NMR (400 MHz,  $CDCl_3$ )  $\delta$  8.75 (s, 1H), 8.08 – 8.03 (m, 1H), 7.88 (dd,  $J = 8.2, 1.5$  Hz, 1H), 7.84 (ddd,  $J = 8.2, 6.9, 1.5$  Hz, 1H), 7.61 (ddd,  $J = 8.2, 6.9, 1.2$  Hz, 1H), 7.48 – 7.44 (m, 1H), 7.15 – 7.04 (m, 3H), 3.87 – 3.81 (m, 2H), 2.77 (s, 3H), 2.70 (t,  $J = 6.8$  Hz, 2H), 1.90 – 1.78 (m, 2H).  $^{13}C\{^1H\}$  NMR (101 MHz,  $CDCl_3$ )  $\delta$  155.7, 148.7, 139.3, 137.2, 133.4, 132.6, 130.4, 129.6, 128.9, 128.8, 127.5, 126.7, 125.5, 125.2, 124.1, 46.5, 26.7, 24.6, 22.6. HRMS (ESI)  $m/z$ :  $[M+Na]^+$  Calcd for  $C_{19}H_{18}N_2NaO_2S$   $[M+Na]^+$  361.0981; Found 361.0985.

*N,2-Dimethyl-N,7-diphenylquinoline-3-sulfonamide (5d)*

Prepared from 3-azido-[1,1'-biphenyl]-4-carbaldehyde (**1d**) and *N*-methyl-2-oxo-*N*-phenylpropane-1-sulfonamide (**2a**) according to **GP1**. Eluent: hexane/ethyl acetate from 100:0 to 75:25. Yield: 192 mg (99%). Light yellow powder; mp 132-134°C.  $^1H$  NMR (400 MHz,  $CDCl_3$ )  $\delta$  8.66 (s, 1H), 8.28 (d,  $J = 1.7$  Hz, 1H), 7.91 (d,  $J = 8.5$  Hz, 1H), 7.86 (dd,  $J = 8.5, 1.7$  Hz, 1H), 7.78 – 7.73 (m, 2H), 7.55 – 7.48 (m, 2H), 7.47 – 7.41 (m, 1H), 7.35 – 7.26 (m, 3H), 7.24 – 7.20 (m, 2H), 3.33 (s, 3H), 2.72 (s, 3H).  $^{13}C\{^1H\}$  NMR (101 MHz,  $CDCl_3$ )  $\delta$  156.4, 149.1, 145.4, 141.1, 140.1, 139.8, 130.4, 129.5, 129.3, 129.2, 128.6, 127.9, 127.6, 127.1, 127.1, 126.2, 124.4, 38.8, 24.8. HRMS (ESI)  $m/z$ :  $[M+H]^+$  Calcd for  $C_{23}H_{21}N_2O_2S$   $[M+H]^+$  389.1318; Found 389.1320.

*7-Bromo-N,2-dimethyl-N-phenylquinoline-3-sulfonamide (5e)*

Prepared from 2-azido-4-bromobenzaldehyde (**1e**) and *N*-methyl-2-oxo-*N*-phenylpropane-1-sulfonamide (**2a**) according to **GP1**. Eluent: hexane/ethyl acetate from 100:0 to 85:15. Yield: 82 mg (42%). Yellow powder; mp 132-133°C.  $^1H$  NMR (400 MHz,  $CDCl_3$ )  $\delta$  8.59 (s, 1H), 8.24 (d,  $J = 1.8$  Hz, 1H), 7.70 (d,  $J = 8.6$  Hz, 1H), 7.66 (dd,  $J = 8.6, 1.8$  Hz, 1H), 7.33 – 7.27 (m, 3H), 7.21 – 7.14 (m, 2H), 3.31 (s, 3H), 2.69 (s, 3H).  $^{13}C\{^1H\}$  NMR (101 MHz,  $CDCl_3$ )  $\delta$  157.3, 149.2, 140.9, 140.1, 131.3, 131.1, 131.1, 129.9, 129.5, 128.0, 127.2, 127.1, 124.0, 38.9, 24.8. HRMS (ESI)  $m/z$ :  $[M+H]^+$  Calcd for  $C_{17}H_{16}BrN_2O_2S$   $[M+H]^+$  391.0110; Found 391.0108.

*N,2-Dimethyl-6-nitro-N-phenylquinoline-3-sulfonamide (5f)*

Prepared from 2-azido-5-nitrobenzaldehyde (**1f**) and *N*-methyl-2-oxo-*N*-phenylpropane-1-sulfonamide (**2a**) according to **GP1**. Eluent: hexane/ethyl acetate from 100:0 to 70:30. Yield: 10 mg (6%). Beige powder; mp 182°C.  $^1H$  NMR (400 MHz,  $CDCl_3$ )  $\delta$  8.79 (d,  $J = 2.5$  Hz, 1H), 8.78 (s, 1H), 8.57 (dd,  $J = 9.2, 2.5$  Hz, 1H), 8.18 (d,  $J = 9.2$  Hz, 1H), 7.35 – 7.28 (m, 3H), 7.22 – 7.17 (m, 2H), 3.36 (s, 3H), 2.77 (s, 3H).  $^{13}C\{^1H\}$  NMR (126 MHz,  $CDCl_3$ )  $\delta$  160.2, 150.5, 146.0, 141.4, 140.6, 133.0, 130.7, 129.7, 128.3, 127.1, 125.8, 125.4, 124.4, 39.0, 25.2. HRMS (ESI)  $m/z$ :  $[M+H]^+$  Calcd for  $C_{17}H_{16}N_3O_4S$   $[M+H]^+$  358.0856; Found 358.0853.

*6-Chloro-N,2-dimethyl-N-phenylquinoline-3-sulfonamide (5g)*

Prepared from 2-azido-5-chlorobenzaldehyde (**1g**) and *N*-methyl-2-oxo-*N*-phenylpropane-1-sulfonamide (**2a**) according to **GP1**. Eluent: hexane/ethyl acetate from 100:0 to 80:20. Yield: 73 mg (42%). White powder; mp 165-166°C. <sup>1</sup>H NMR (400 MHz, CDCl<sub>3</sub>) δ 8.54 (s, 1H), 7.98 (d, *J* = 9.0 Hz, 1H), 7.81 (d, *J* = 2.4 Hz, 1H), 7.74 (dd, *J* = 9.0, 2.4 Hz, 1H), 7.34 – 7.27 (m, 3H), 7.22 – 7.10 (m, 2H), 3.31 (s, 3H), 2.69 (s, 3H). <sup>13</sup>C{<sup>1</sup>H} NMR (101 MHz, CDCl<sub>3</sub>) δ 156.3, 147.1, 140.9, 139.2, 133.4, 133.2, 131.7, 130.3, 129.5, 128.0, 127.3, 127.1, 126.0, 38.9, 24.7. HRMS (ESI) *m/z*: [M+H]<sup>+</sup> Calcd for C<sub>17</sub>H<sub>16</sub>ClN<sub>2</sub>O<sub>2</sub>S [M+H]<sup>+</sup> 347.0616; Found 347.0624.

*N,2-Dimethyl-5-oxo-N-phenyl-5H-chromeno[4,3-b]pyridine-3-sulfonamide (5h)*

Prepared from 4-azido-2-oxo-2*H*-chromene-3-carbaldehyde (**1h**) and *N*-methyl-2-oxo-*N*-phenylpropane-1-sulfonamide (**2a**) according to **GP1**. Eluent: hexane/ethyl acetate from 100:0 to 80:20. Yield: 45 mg (47%). White powder; mp 162-163°C. <sup>1</sup>H NMR (400 MHz, CDCl<sub>3</sub>) δ 8.94 (s, 1H), 8.57 (d, *J* = 7.9 Hz, 1H), 7.64 (t, *J* = 7.9 Hz, 1H), 7.44 – 7.37 (m, 2H), 7.36 – 7.29 (m, 3H), 7.21 (d, *J* = 7.4 Hz, 2H), 3.34 (s, 3H), 2.65 (s, 3H). <sup>13</sup>C{<sup>1</sup>H} NMR (101 MHz, CDCl<sub>3</sub>) δ 164.7, 160.0, 153.6, 153.4, 140.7, 140.7, 133.7, 133.4, 129.6, 128.2, 127.0, 125.7, 125.3, 118.4, 117.5, 114.9, 39.0, 25.1. HRMS (ESI) *m/z*: [M+Na]<sup>+</sup> Calcd for C<sub>20</sub>H<sub>16</sub>N<sub>2</sub>NaO<sub>4</sub>S [M+Na]<sup>+</sup> 403.0723; Found 403.0727.

*2-Methyl-N-phenylquinoline-3-sulfonamide (5i)*

Prepared from 2-azidobenzaldehyde (**1a**) and 2-oxo-*N*-phenylpropane-1-sulfonamide (**2i**) according to **GP2**. Eluent: hexane/ethyl acetate from 100:0 to 65:35. Yield: 94 mg (79%). White powder; mp 186-187°C. <sup>1</sup>H NMR (400 MHz, DMSO-*d*<sub>6</sub>) δ 10.7 (s, 1H), 9.0 (s, 1H), 8.2 (dd, *J* = 8.4, 1.3 Hz, 1H), 8.0 (d, *J* = 8.2 Hz, 1H), 7.9 (ddd, *J* = 8.4, 6.8, 1.5 Hz, 1H), 7.6 (ddd, *J* = 8.2, 6.8, 1.3 Hz, 1H), 7.2 – 7.2 (m, 2H), 7.2 – 7.1 (m, 2H), 7.0 – 6.9 (m, 1H), 2.9 (s, 3H). <sup>13</sup>C{<sup>1</sup>H} NMR (101 MHz, DMSO-*d*<sub>6</sub>) δ 154.4, 147.9, 139.5, 137.0, 132.6, 131.7, 129.3, 129.2, 127.9, 127.3, 124.9, 124.0, 119.3, 23.8. HRMS (ESI) *m/z*: [M+Na]<sup>+</sup> Calcd for C<sub>16</sub>H<sub>14</sub>N<sub>2</sub>NaO<sub>2</sub>S [M+Na]<sup>+</sup> 321.0668; Found 321.0665.

*N-Benzyl-2-methylquinoline-3-sulfonamide (5j)*

Prepared from 2-azidobenzaldehyde (**1a**) and *N*-benzyl-2-oxopropane-1-sulfonamide (**2j**) according to **GP2**. Eluent: hexane/ethyl acetate from 100:0 to 65:35. Yield: 105 mg (84%). White powder; mp 129°C. <sup>1</sup>H NMR (400 MHz, DMSO-*d*<sub>6</sub>) δ 8.76 (s, 1H), 8.61 (t, *J* = 6.1 Hz, 1H), 8.10 (d, *J* = 8.2 Hz, 1H), 7.98 (d, *J* = 8.4 Hz, 1H), 7.87 (ddd, *J* = 8.2, 6.9, 1.3 Hz, 1H), 7.69 – 7.61 (m, 1H), 7.16 (dd, *J* = 13.1, 5.8 Hz, 4H), 7.08 (t, *J* = 7.0 Hz, 1H), 4.12 (d, *J* = 6.1 Hz, 2H), 2.90 (s, 3H). <sup>13</sup>C{<sup>1</sup>H} NMR (101 MHz, DMSO-*d*<sub>6</sub>) δ 154.6, 147.6, 137.8, 137.4, 133.2, 132.1, 129.1, 128.1, 127.8, 127.5, 127.0, 125.1, 45.9, 23.8. HRMS (ESI) *m/z*: [M+Na]<sup>+</sup> Calcd for C<sub>17</sub>H<sub>16</sub>N<sub>2</sub>NaO<sub>2</sub>S [M+Na]<sup>+</sup> 335.0825; Found 335.0830.

*2-Methyl-N-(o-tolyl)quinoline-3-sulfonamide (5k)*

Prepared from 2-azidobenzaldehyde (**1a**) and 2-oxo-*N*-(*o*-tolyl)propane-1-sulfonamide (**2k**) according to **GP2**. Eluent: hexane/ethyl acetate from 100:0 to 65:35. Yield: 106 mg (85%). Beige powder; mp 155-156°C. <sup>1</sup>H NMR (400 MHz, CDCl<sub>3</sub>) δ 8.72 (s, 1H), 8.06 (d, *J* = 8.6 Hz, 1H), 7.86 – 7.79 (m, 2H), 7.57 (t, *J* = 7.5 Hz, 1H), 7.16 – 6.99 (m, 4H), 6.81 (s, 1H), 3.03 (s, 3H), 2.21 (s, 3H).

$^{13}\text{C}\{^1\text{H}\}$  NMR (101 MHz,  $\text{CDCl}_3$ )  $\delta$  155.0, 148.8, 139.7, 134.0, 132.7, 132.6, 131.9, 131.3, 129.0, 128.7, 127.5, 127.1, 126.7, 125.5, 124.1, 24.5, 18.0. HRMS (ESI)  $m/z$ :  $[\text{M}+\text{H}]^+$  Calcd for  $\text{C}_{17}\text{H}_{17}\text{N}_2\text{O}_2\text{S}$   $[\text{M}+\text{H}]^+$  313.1005; Found 313.1003.

#### *2-Ethoxy-N-phenylquinoline-3-sulfonamide (5l)*

Prepared from 2-azidobenzaldehyde (**1a**) and ethyl 2-((phenylamino)sulfinyl)acetate (**2l**) according to **GP2**. Eluent: hexane/ethyl acetate from 100:0 to 80:20. Yield: 83 mg (63%). White powder; mp 203-204°C.  $^1\text{H}$  NMR (400 MHz,  $\text{DMSO}-d_6$ )  $\delta$  10.26 (s, 1H), 8.89 (s, 1H), 8.09 (d,  $J = 8.1$  Hz, 1H), 7.84 – 7.69 (m, 2H), 7.49 (ddd,  $J = 8.1, 6.6, 1.5$  Hz, 1H), 7.27 – 7.07 (m, 4H), 6.95 (t,  $J = 7.0$  Hz, 1H), 4.59 (q,  $J = 7.0$  Hz, 2H), 1.38 (t,  $J = 7.0$  Hz, 3H).  $^{13}\text{C}\{^1\text{H}\}$  NMR (101 MHz,  $\text{DMSO}-d_6$ )  $\delta$  155.9, 147.2, 142.6, 137.3, 132.8, 129.4, 129.0, 126.3, 125.2, 123.9, 123.2, 122.9, 119.6, 62.4, 14.2. HRMS (ESI)  $m/z$ :  $[\text{M}+\text{Na}]^+$  Calcd for  $\text{C}_{17}\text{H}_{16}\text{N}_2\text{NaO}_3\text{S}$   $[\text{M}+\text{Na}]^+$  351.0774; Found 351.0785.

#### *N-(4-Methoxyphenyl)-2-methylquinoline-3-sulfonamide (5m)*

Prepared from 2-azidobenzaldehyde (**1a**) and *N*-(4-methoxyphenyl)-2-oxopropane-1-sulfonamide (**2m**) according to **GP2**. Eluent: hexane/ethyl acetate from 100:0 to 65:35. Yield: 113 mg (86%). Light orange oil.  $^1\text{H}$  NMR (400 MHz,  $\text{CDCl}_3$ )  $\delta$  8.67 (s, 1H), 8.05 (d,  $J = 8.8$  Hz, 1H), 7.84 – 7.79 (m, 2H), 7.56 (ddd,  $J = 8.1, 6.9, 1.2$  Hz, 1H), 7.01 – 6.96 (m, 2H), 6.87 (s, 1H), 6.74 – 6.68 (m, 2H), 3.69 (s, 3H), 3.04 (s, 3H).  $^{13}\text{C}\{^1\text{H}\}$  NMR (101 MHz,  $\text{CDCl}_3$ )  $\delta$  158.4, 155.0, 148.8, 140.1, 132.7, 131.9, 129.0, 128.6, 128.0, 127.5, 125.8, 125.5, 114.8, 55.5, 24.5. HRMS (ESI)  $m/z$ :  $[\text{M}+\text{Na}]^+$  Calcd for  $\text{C}_{17}\text{H}_{16}\text{N}_2\text{NaO}_3\text{S}$   $[\text{M}+\text{Na}]^+$  351.0774; Found 351.0776.

#### *2-Methyl-N-(4-(trifluoromethyl)phenyl)quinoline-3-sulfonamide (5n)*

Prepared from 2-azidobenzaldehyde (**1a**) and 2-oxo-*N*-(4-(trifluoromethyl)phenyl)propane-1-sulfonamide (**2n**) according to **GP2**. Eluent: hexane/ethyl acetate from 100:0 to 75:25. Yield: 93 mg (63%). Yellow oil.  $^1\text{H}$  NMR (400 MHz,  $\text{CDCl}_3$ )  $\delta$  8.86 (s, 1H), 8.06 (dd,  $J = 8.4, 1.2$  Hz, 2H), 7.90 (dd,  $J = 8.2, 1.5$  Hz, 1H), 7.84 (td,  $J = 8.4, 6.9, 1.5$  Hz, 2H), 7.61 (ddd,  $J = 8.2, 6.9, 1.2$  Hz, 2H), 7.46 (d,  $J = 8.4$  Hz, 2H), 7.20 (d,  $J = 8.4$  Hz, 2H).  $^{13}\text{C}\{^1\text{H}\}$  NMR (101 MHz,  $\text{CDCl}_3$ )  $\delta$  154.6, 148.9, 140.2, 139.4, 133.2, 131.5, 129.0, 128.7, 127.8, 127.0 (q, C-F,  $^3J_{\text{C-F}} = 3.9$  Hz), 125.4, 123.9 (q, C-F,  $^1J_{\text{C-F}} = 271.6$  Hz), 119.4, 24.3.  $^{19}\text{F}\{^1\text{H}\}$  NMR (376 MHz,  $\text{CDCl}_3$ )  $\delta$  -62.4. HRMS (ESI)  $m/z$ :  $[\text{M}+\text{H}]^+$  Calcd for  $\text{C}_{17}\text{H}_{14}\text{F}_3\text{N}_2\text{O}_2\text{S}$   $[\text{M}+\text{H}]^+$  367.0723; Found 367.0729.

#### *2-Methyl-3-tosylquinoline (5o)*

Prepared from 2-azidobenzaldehyde (**1a**) and 1-tosylpropan-2-one (**2o**) according to **GP1**. Eluent: hexane/ethyl acetate from 100:0 to 75:25. Yield: 109 mg (73%). Light yellow powder; mp 151-152°C. The spectral characteristics matched the previously reported data [9].  $^1\text{H}$  NMR (400 MHz,  $\text{CDCl}_3$ )  $\delta$  9.03 (s, 1H), 8.03 (dd,  $J = 8.5, 1.0$  Hz, 1H), 7.97 (dd,  $J = 8.2, 1.3$  Hz, 1H), 7.85 – 7.82 (m, 1H), 7.80 (d,  $J = 8.2$  Hz, 2H), 7.61 (ddd,  $J = 8.2, 6.9, 1.0$  Hz, 1H), 7.31 (d,  $J = 8.2$  Hz, 2H), 2.79 (s, 3H), 2.41 (s, 3H).  $^{13}\text{C}\{^1\text{H}\}$  NMR (101 MHz,  $\text{CDCl}_3$ )  $\delta$  155.4, 149.2, 144.8, 139.2, 137.4, 134.0, 132.8, 130.0, 129.1, 128.8, 128.2, 127.5, 125.7, 24.4, 21.7. HRMS (ESI)  $m/z$ :  $[\text{M}+\text{Na}]^+$  Calcd for  $\text{C}_{17}\text{H}_{15}\text{NNaO}_2\text{S}$   $[\text{M}+\text{Na}]^+$  320.0716; Found 320.0711.

### 2-Phenyl-3-tosylquinoline (**5p**)

Prepared from 2-azidobenzaldehyde (**1a**) and 1-phenyl-2-tosylethan-1-one (**2p**) according to **GP1**. Yield: 119 mg (66%). Beige powder; mp 248°C. The spectral characteristics matched the previously reported data [10]. <sup>1</sup>H NMR (400 MHz, CDCl<sub>3</sub>) δ 9.29 (s, 1H), 8.16 (dd, *J* = 8.5, 1.0 Hz, 2H), 8.08 (dd, *J* = 8.2, 1.5 Hz, 2H), 7.89 (ddd, *J* = 8.5, 6.9, 1.5 Hz, 1H), 7.71 (td, *J* = 8.2, 6.9, 1.0 Hz, 2H), 7.40 (t, *J* = 7.4 Hz, 1H), 7.32 – 7.25 (m, 2H), 7.20 (d, *J* = 7.4 Hz, 2H), 7.13 (d, *J* = 8.1 Hz, 2H), 6.99 (d, *J* = 8.1 Hz, 2H), 2.33 (s, 3H). <sup>13</sup>C{<sup>1</sup>H} NMR (101 MHz, CDCl<sub>3</sub>) δ 157.3, 148.8, 144.1, 139.1, 138.4, 137.0, 135.1, 132.9, 129.8, 129.5, 129.2, 129.1, 128.7, 128.2, 128.1, 127.6, 125.9, 21.7. HRMS (ESI) *m/z*: [M+Na]<sup>+</sup> Calcd for C<sub>22</sub>H<sub>17</sub>NNaO<sub>2</sub>S [M+Na]<sup>+</sup> 382.0872; Found 382.0870.

### 2-(Allyloxy)-3-tosylquinoline (**5q**)

Prepared from 2-azidobenzaldehyde (**1a**) and allyl 2-tosylacetate (**2q**) according to **GP1**. Eluent: hexane/ethyl acetate from 100:0 to 90:10. Yield: 87 mg (51%). Light yellow powder; mp 150-151°C. <sup>1</sup>H NMR (400 MHz, CDCl<sub>3</sub>) δ 8.94 (s, 1H), 7.92 (d, *J* = 8.3 Hz, 2H), 7.89 (dd, *J* = 8.2, 1.5 Hz, 1H), 7.80 (d, *J* = 8.4 Hz, 1H), 7.73 (ddd, *J* = 8.5, 6.8, 1.5 Hz, 1H), 7.47 (ddd, *J* = 8.2, 6.8, 1.3 Hz, 1H), 7.28 (d, *J* = 8.3 Hz, 2H), 6.00 (ddt, *J* = 17.2, 10.4, 5.7 Hz, 1H), 5.33 (ddd, *J* = 17.2, 3.0, 1.6 Hz, 1H), 5.24 (ddd, *J* = 10.4, 3.0, 1.4 Hz, 1H), 4.97 (ddd, *J* = 5.7, 1.6, 1.4 Hz, 2H), 2.41 (s, 3H). <sup>13</sup>C{<sup>1</sup>H} NMR (101 MHz, CDCl<sub>3</sub>) δ 156.2, 148.5, 144.5, 141.4, 137.4, 132.8, 132.5, 129.4, 129.3, 129.2, 127.2, 125.7, 125.5, 124.0, 118.5, 67.5, 21.7. HRMS (ESI) *m/z*: [M+Na]<sup>+</sup> Calcd for C<sub>19</sub>H<sub>17</sub>NNaO<sub>3</sub>S [M+Na]<sup>+</sup> 362.0821; Found 362.0823.

## V. NMR spectra

Copies of  $^1\text{H}$  (400.13 MHz,  $\text{CDCl}_3$ ) and  $^{13}\text{C}\{^1\text{H}\}$  (100.61 MHz,  $\text{CDCl}_3$ ) of **5a**

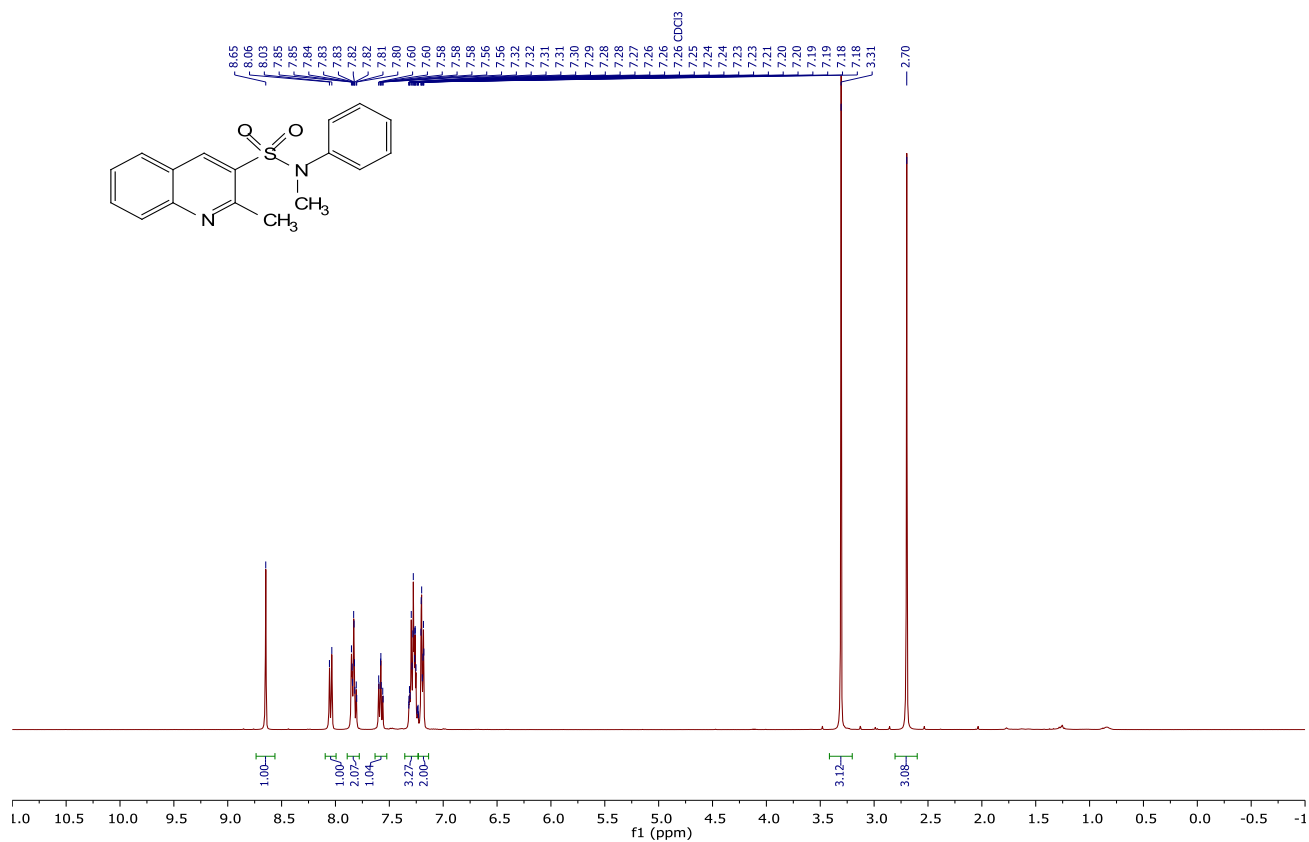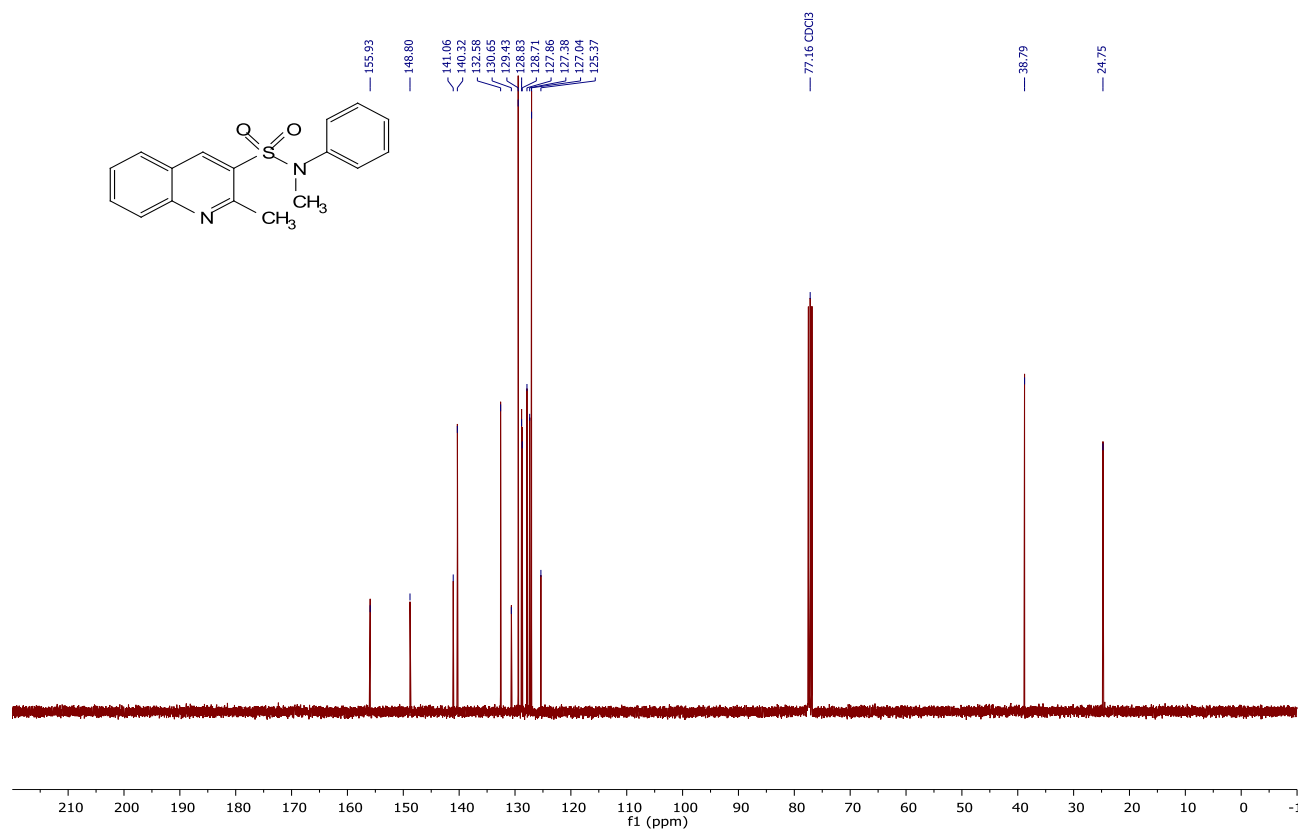

Copies of  $^1\text{H}$  (400.13 MHz,  $\text{CDCl}_3$ ) and  $^{13}\text{C}\{^1\text{H}\}$  (100.61 MHz,  $\text{CDCl}_3$ ) of **5b**

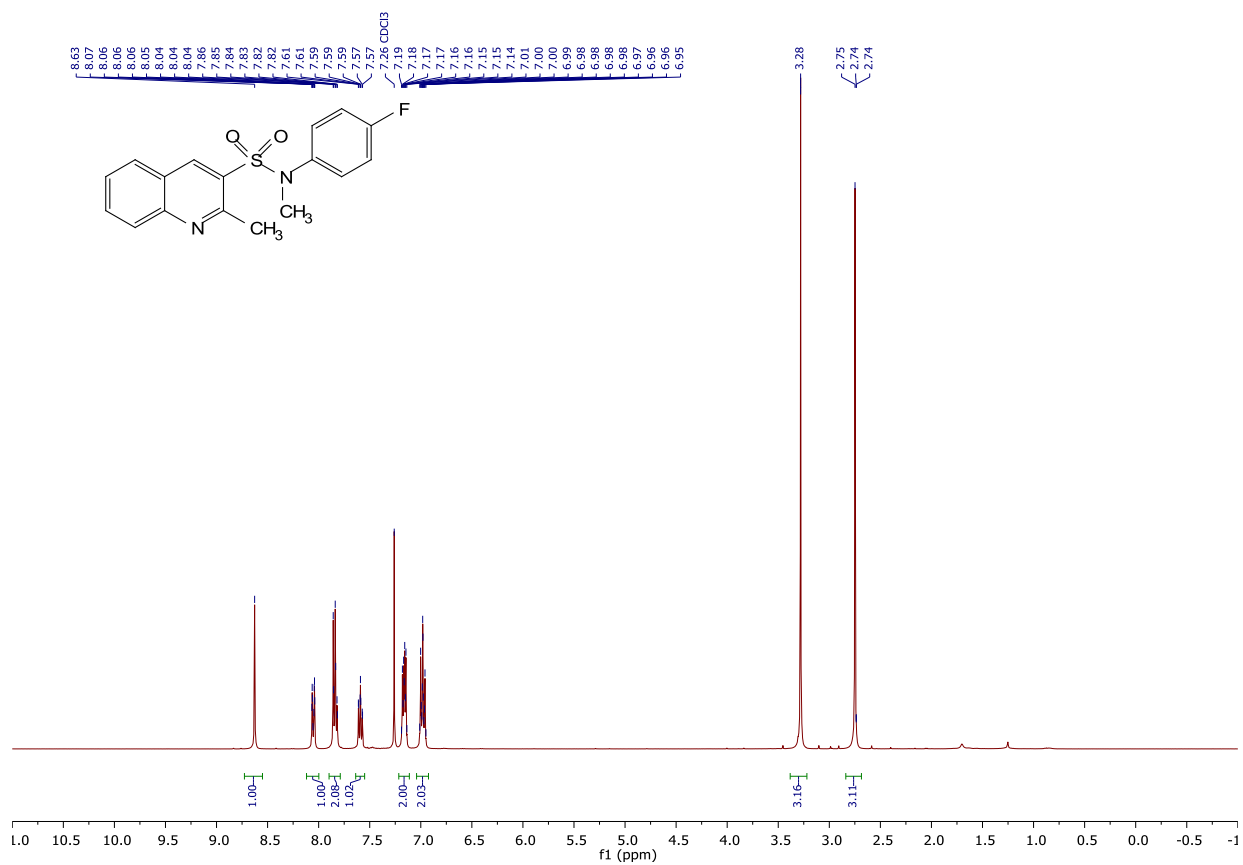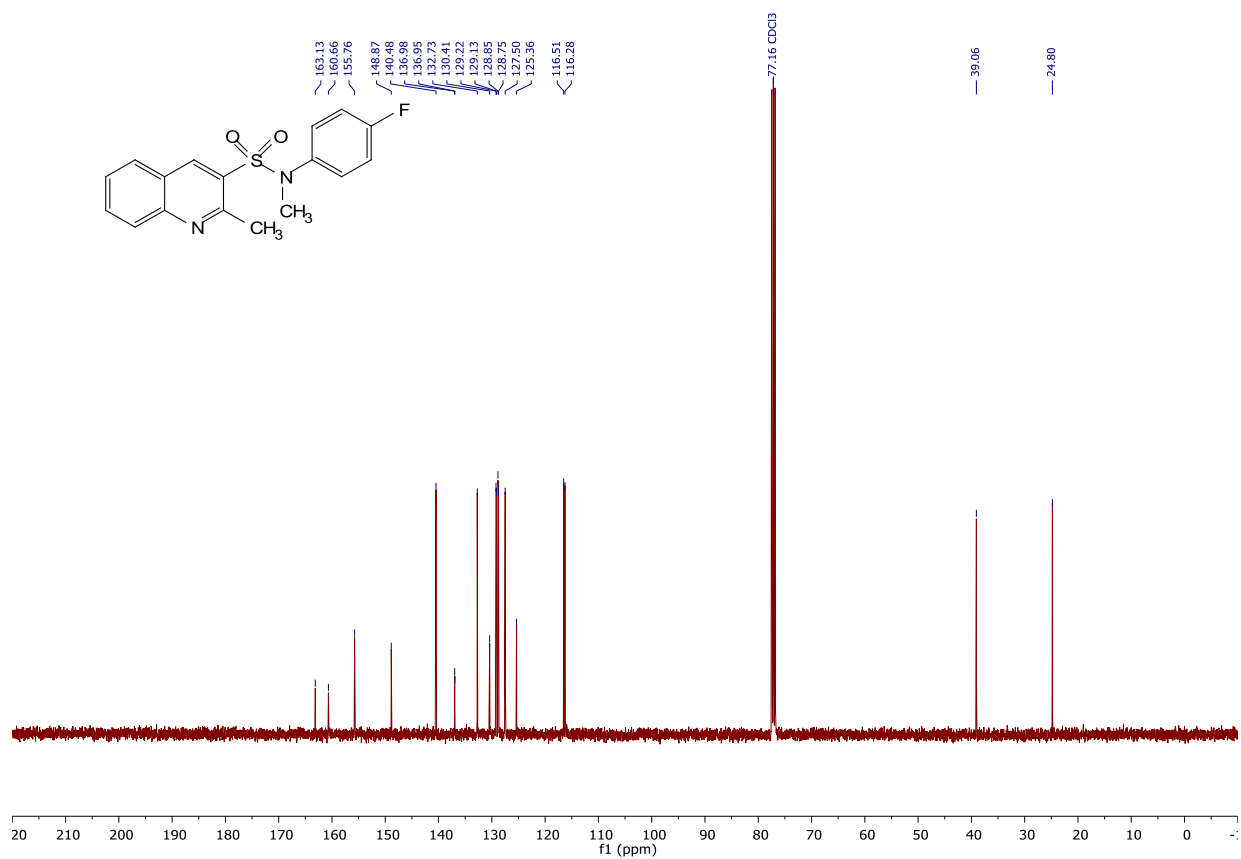

Copy of  $^{19}\text{F}\{^1\text{H}\}$  (376.50 MHz,  $\text{CDCl}_3$ ) spectrum of **5b**

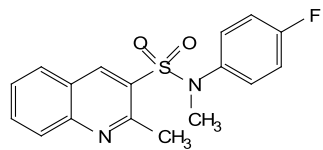

-112.92

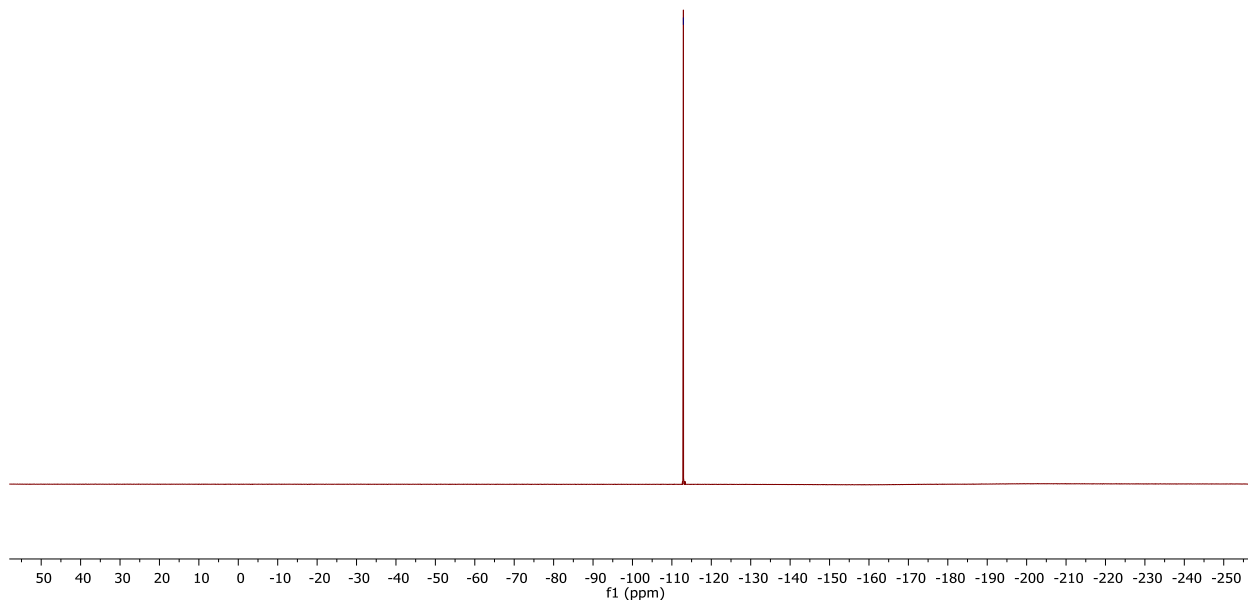

Copies of  $^1\text{H}$  (400.13 MHz,  $\text{CDCl}_3$ ) and  $^{13}\text{C}\{^1\text{H}\}$  (100.61 MHz,  $\text{CDCl}_3$ ) of **5c**

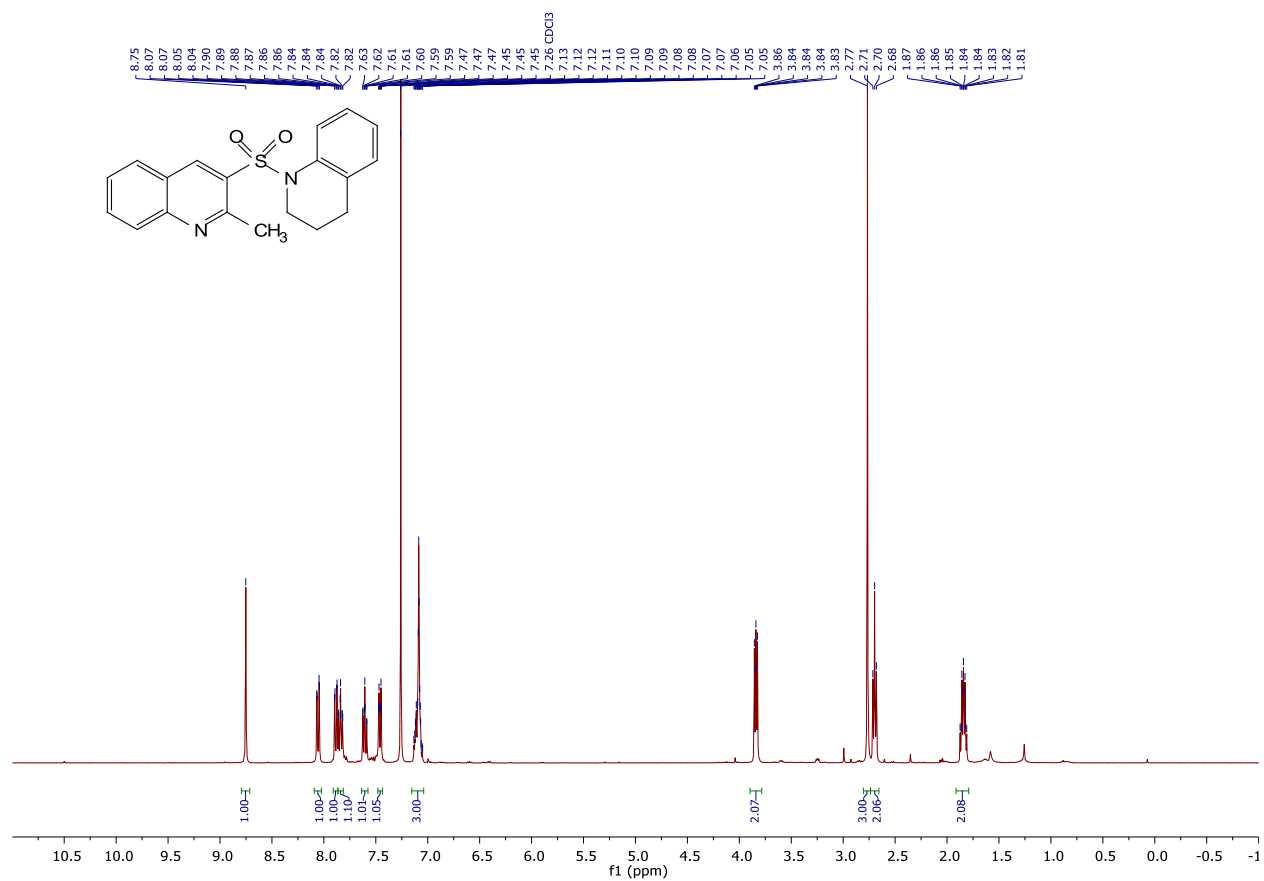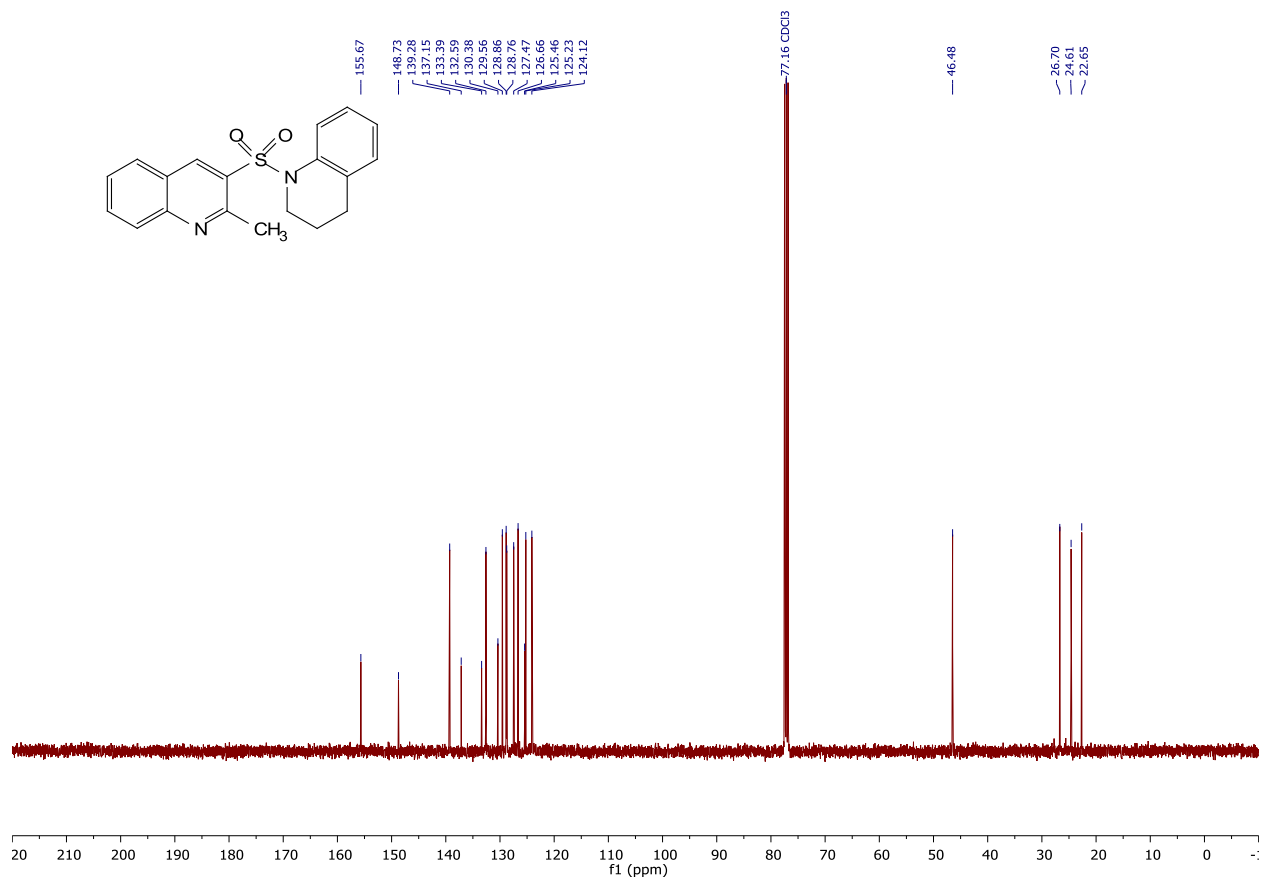





Copies of  $^1\text{H}$  (400.13 MHz,  $\text{CDCl}_3$ ) and  $^{13}\text{C}\{^1\text{H}\}$  (100.61 MHz,  $\text{CDCl}_3$ ) of **5e**

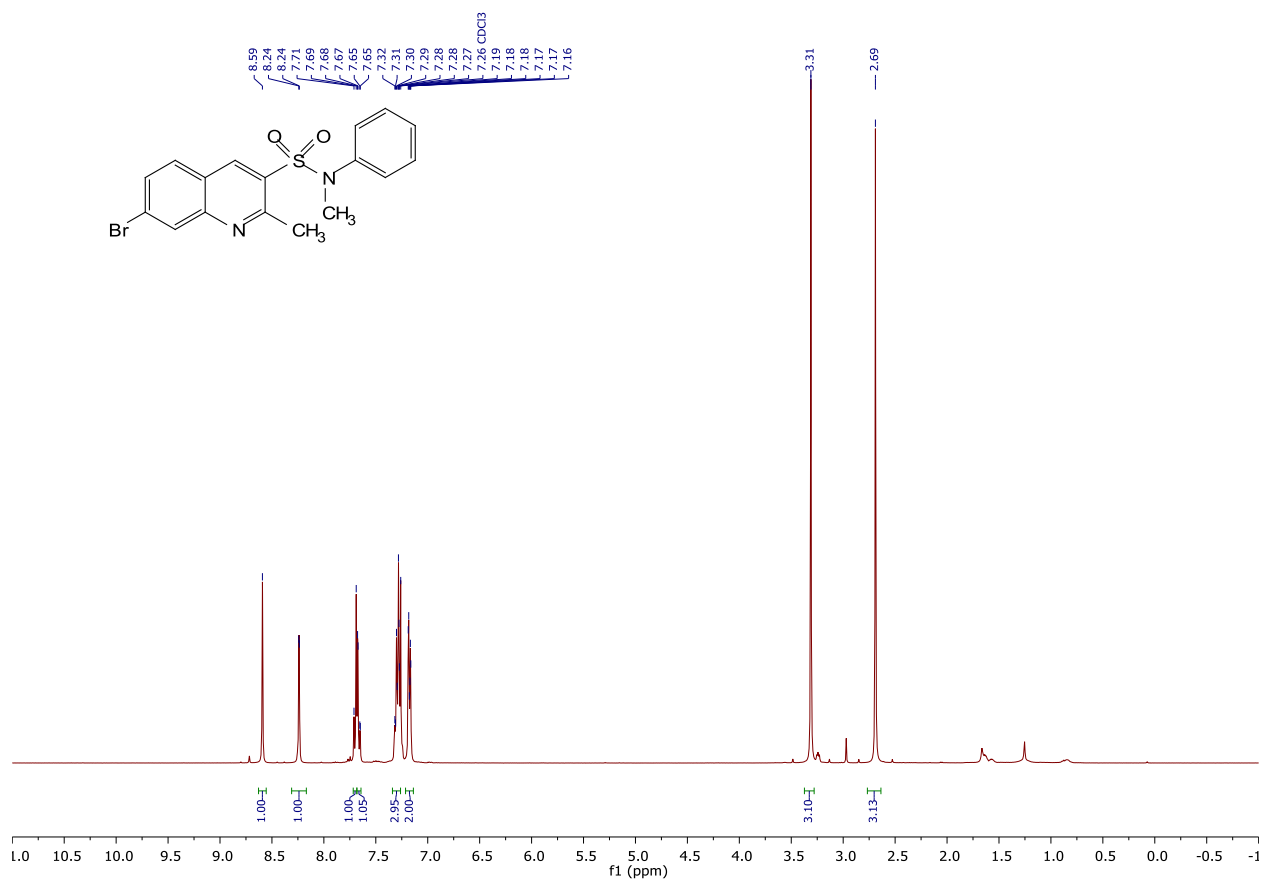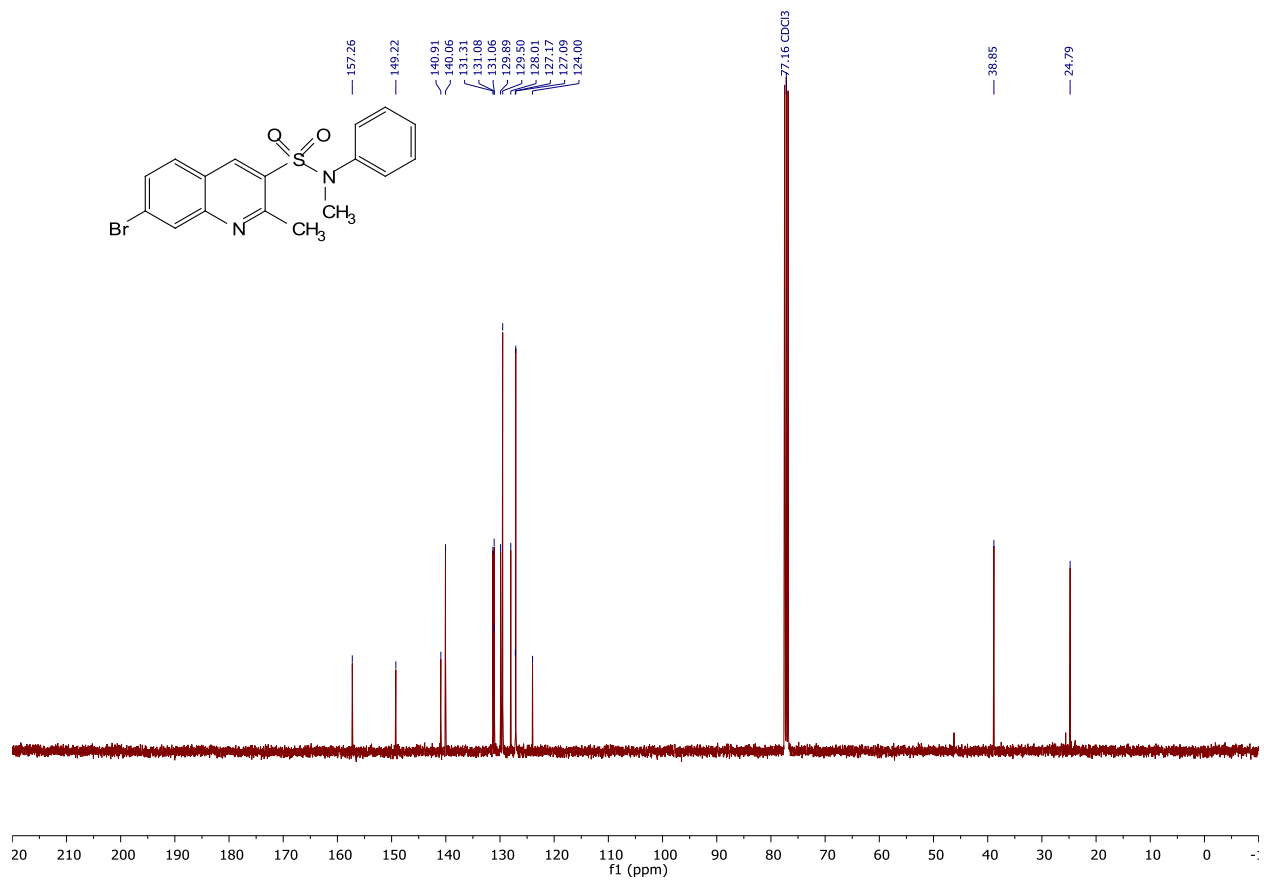

Copies of  $^1\text{H}$  (400.13 MHz,  $\text{CDCl}_3$ ) and  $^{13}\text{C}\{^1\text{H}\}$  (125.75 MHz,  $\text{CDCl}_3$ ) of **5f**

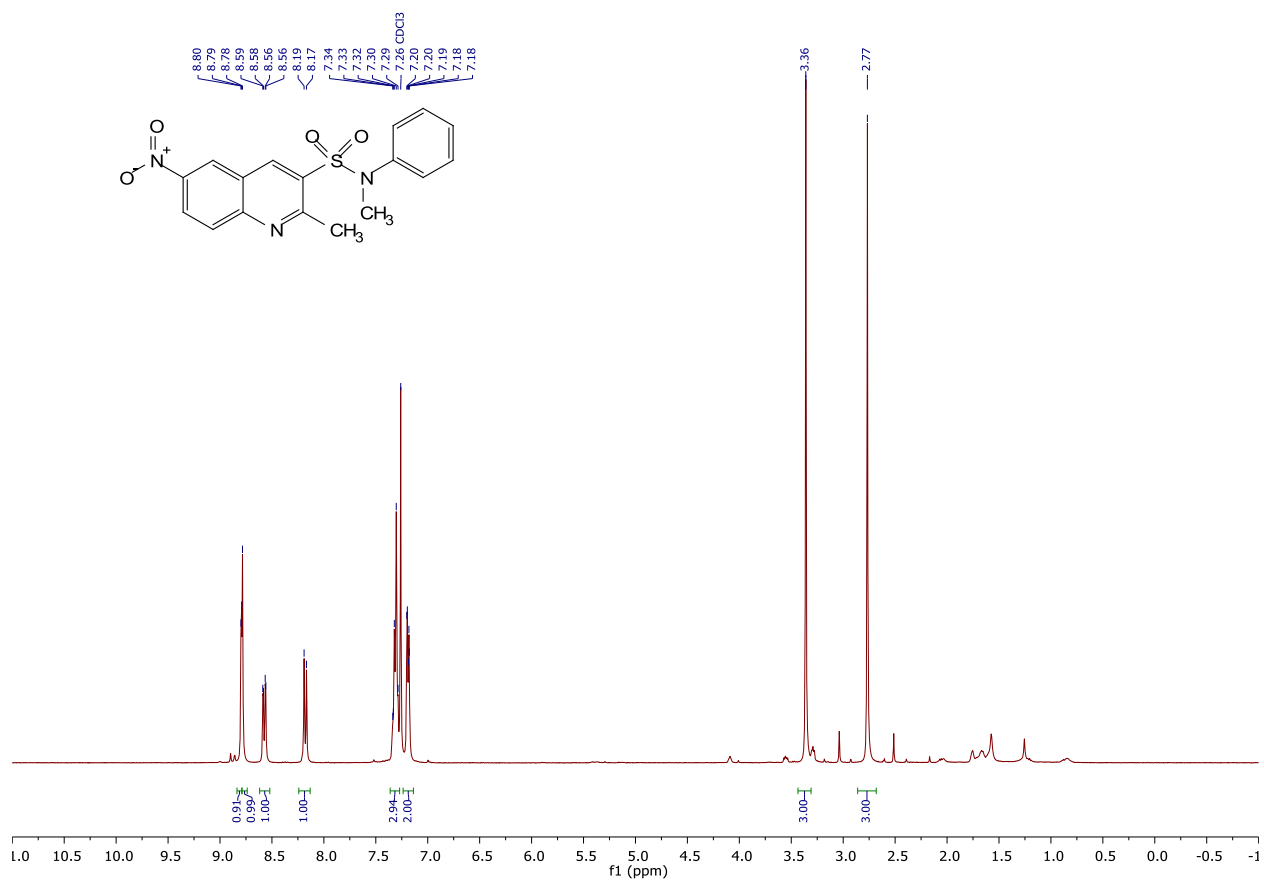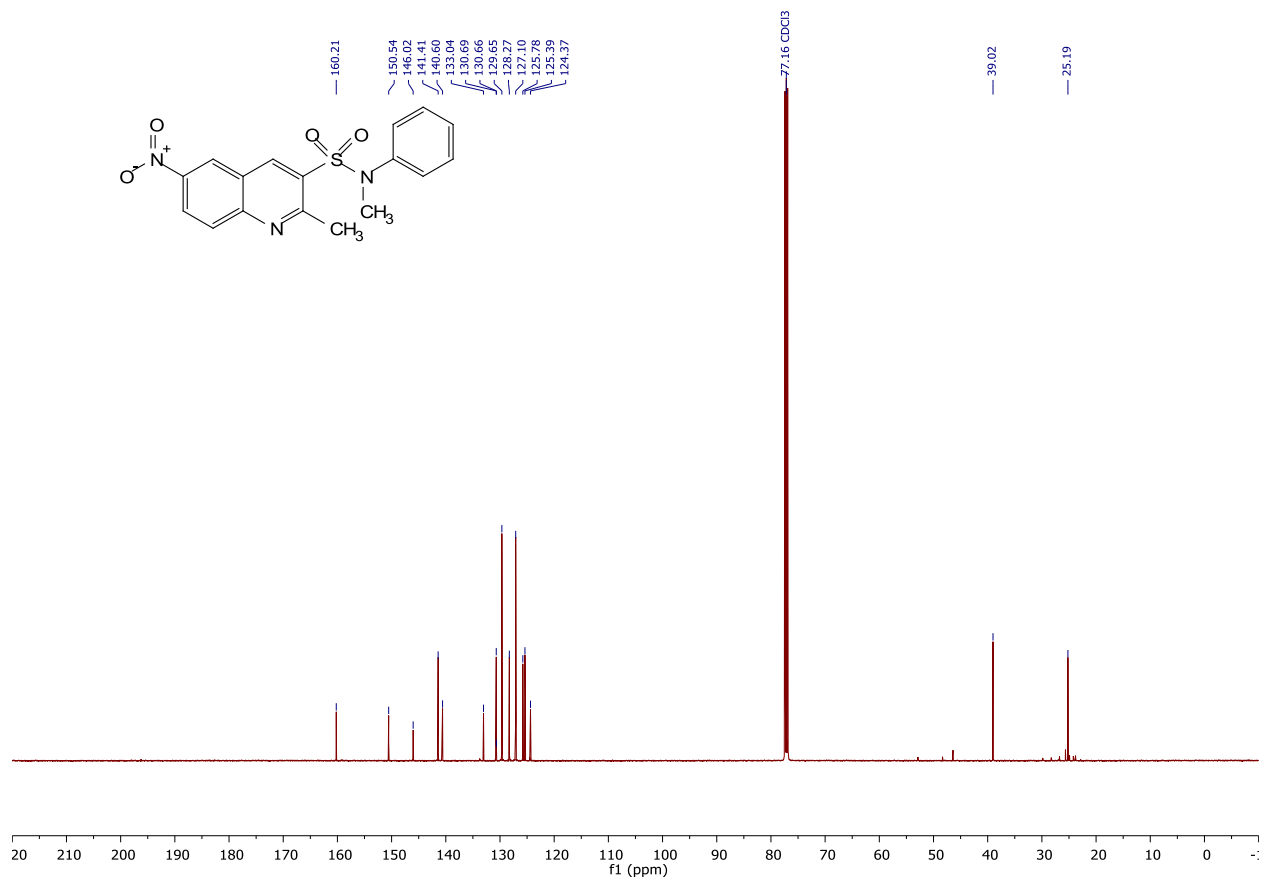

Copies of  $^1\text{H}$  (400.13 MHz,  $\text{CDCl}_3$ ) and  $^{13}\text{C}\{^1\text{H}\}$  (100.61 MHz,  $\text{CDCl}_3$ ) of **5g**

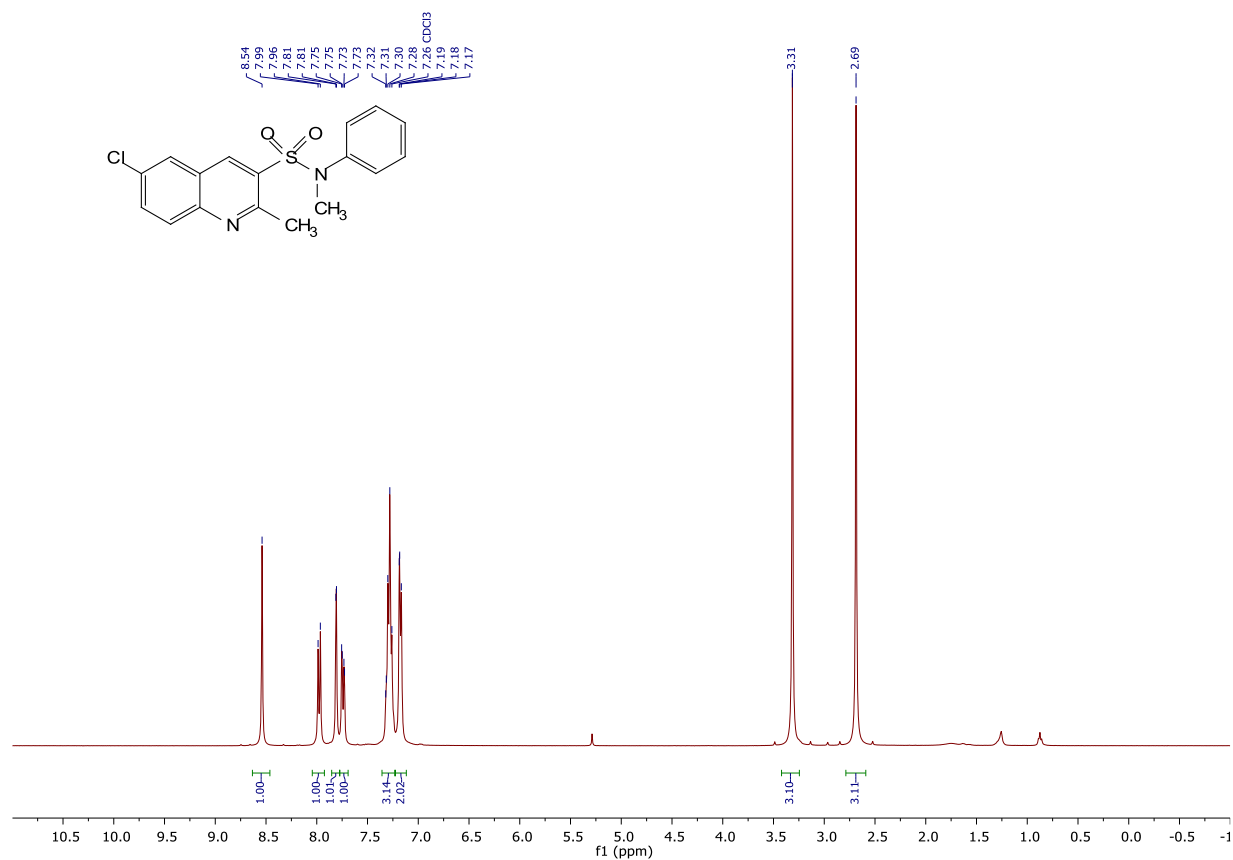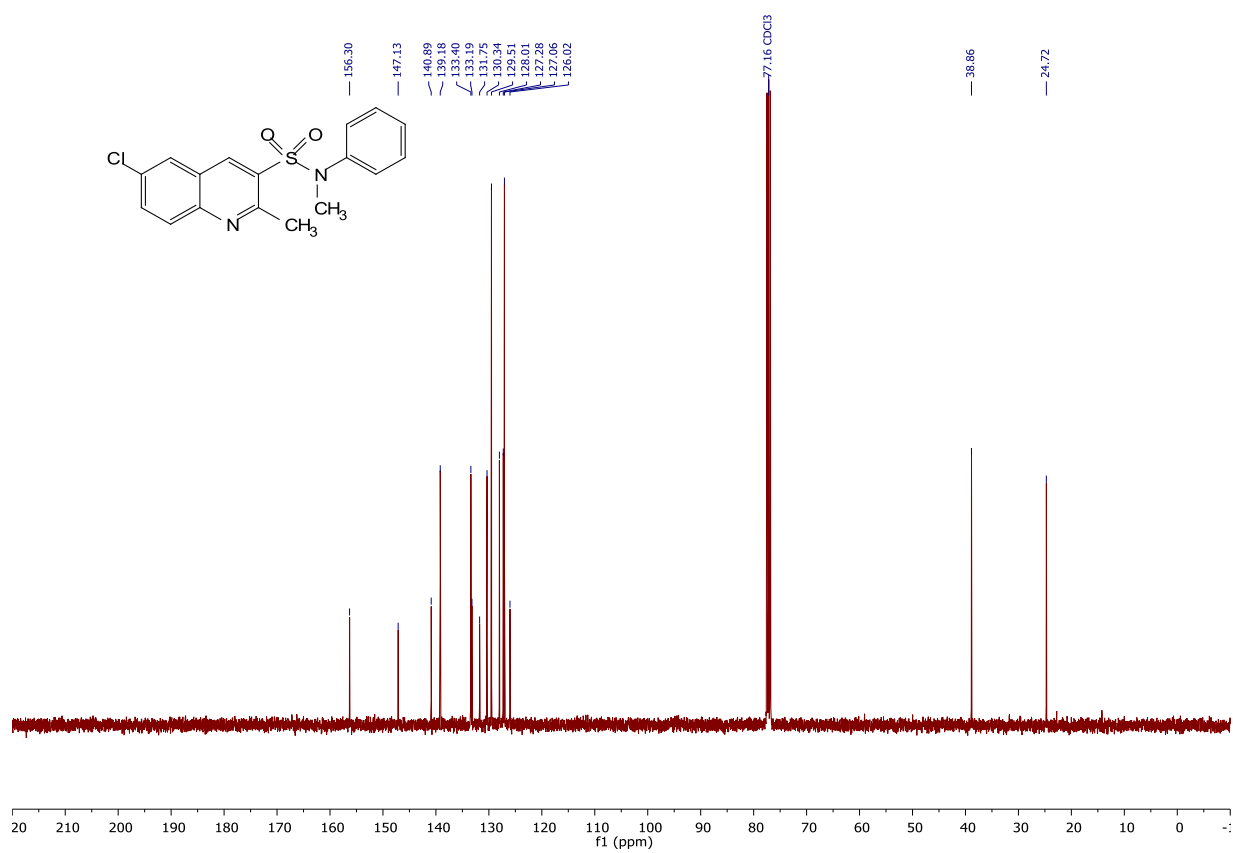

Copies of  $^1\text{H}$  (400.13 MHz,  $\text{CDCl}_3$ ) and  $^{13}\text{C}\{^1\text{H}\}$  (100.61 MHz,  $\text{CDCl}_3$ ) of **5h**

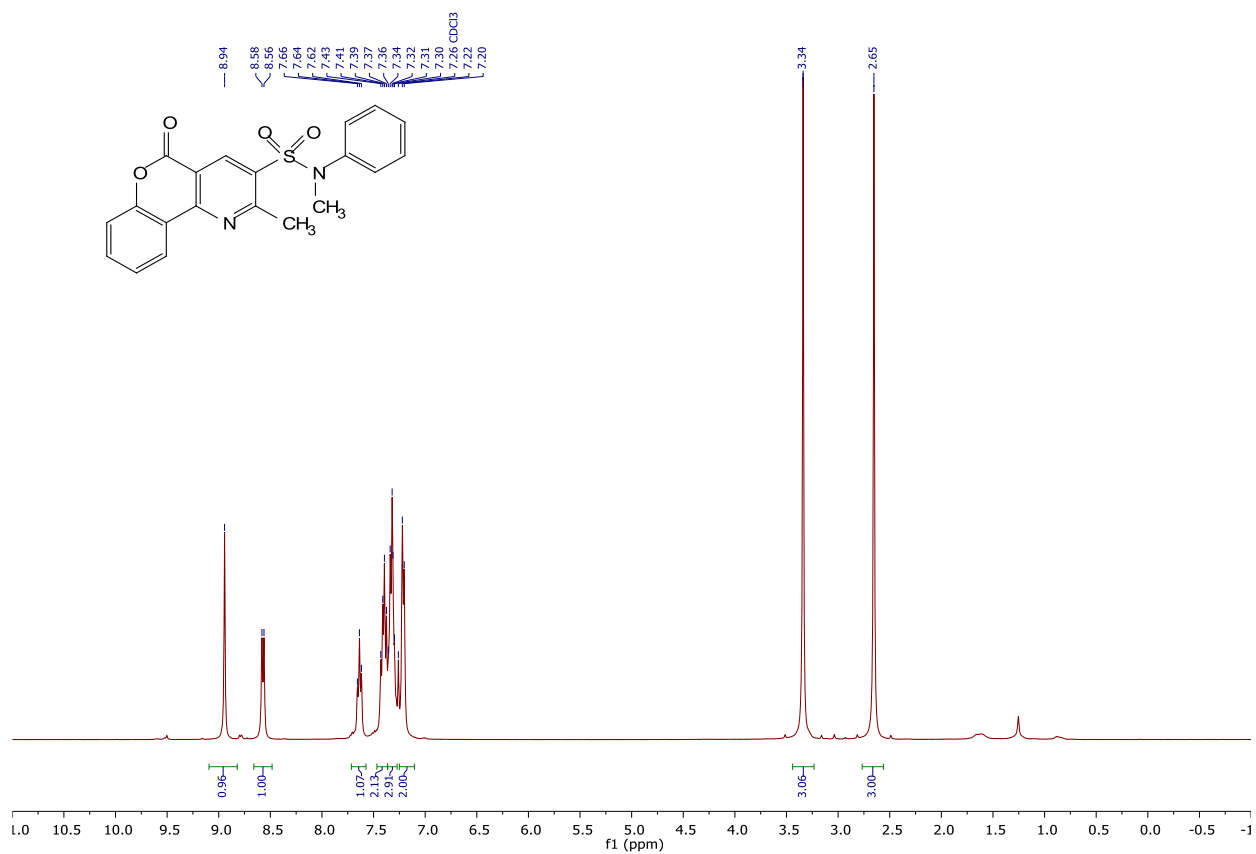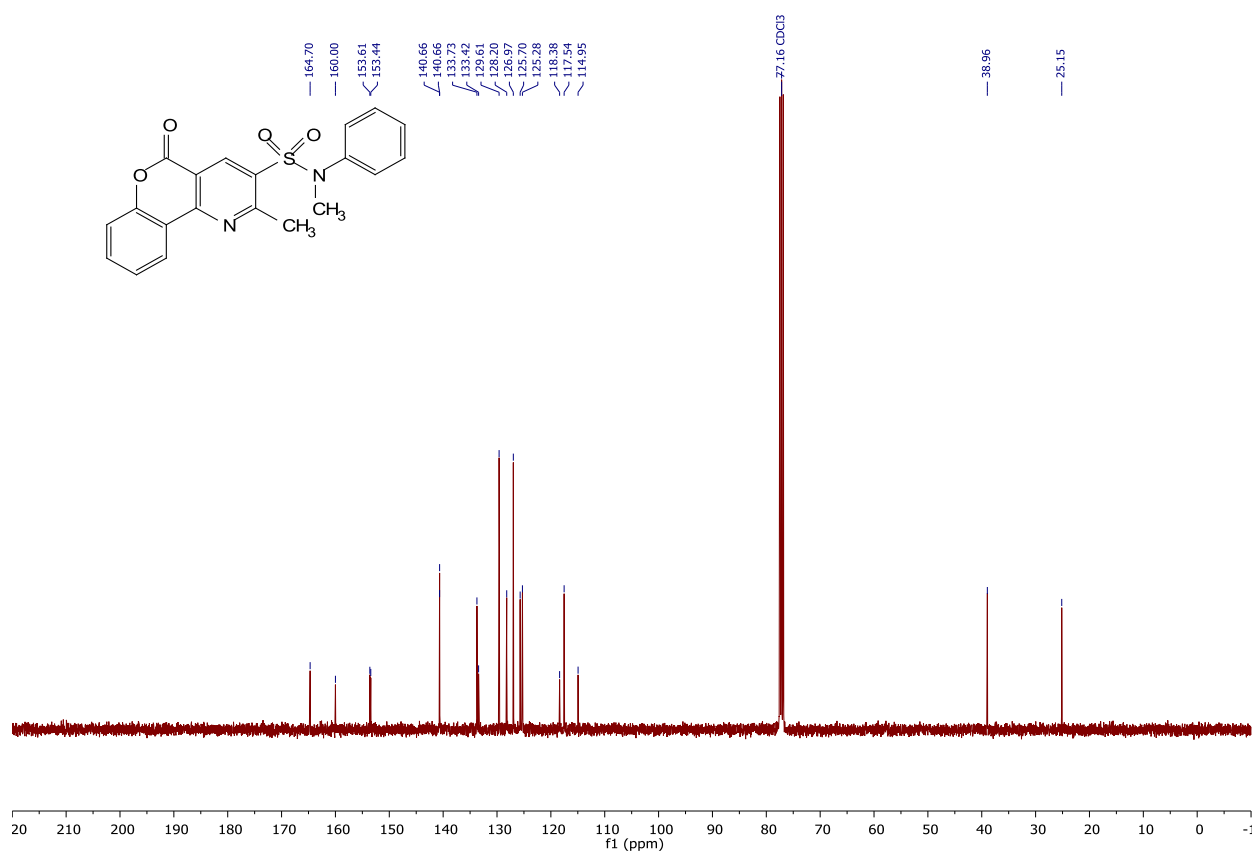

Copies of  $^1\text{H}$  (400.13 MHz,  $\text{DMSO-}d_6$ ) and  $^{13}\text{C}\{^1\text{H}\}$  (100.61 MHz,  $\text{DMSO-}d_6$ ) of **5i**

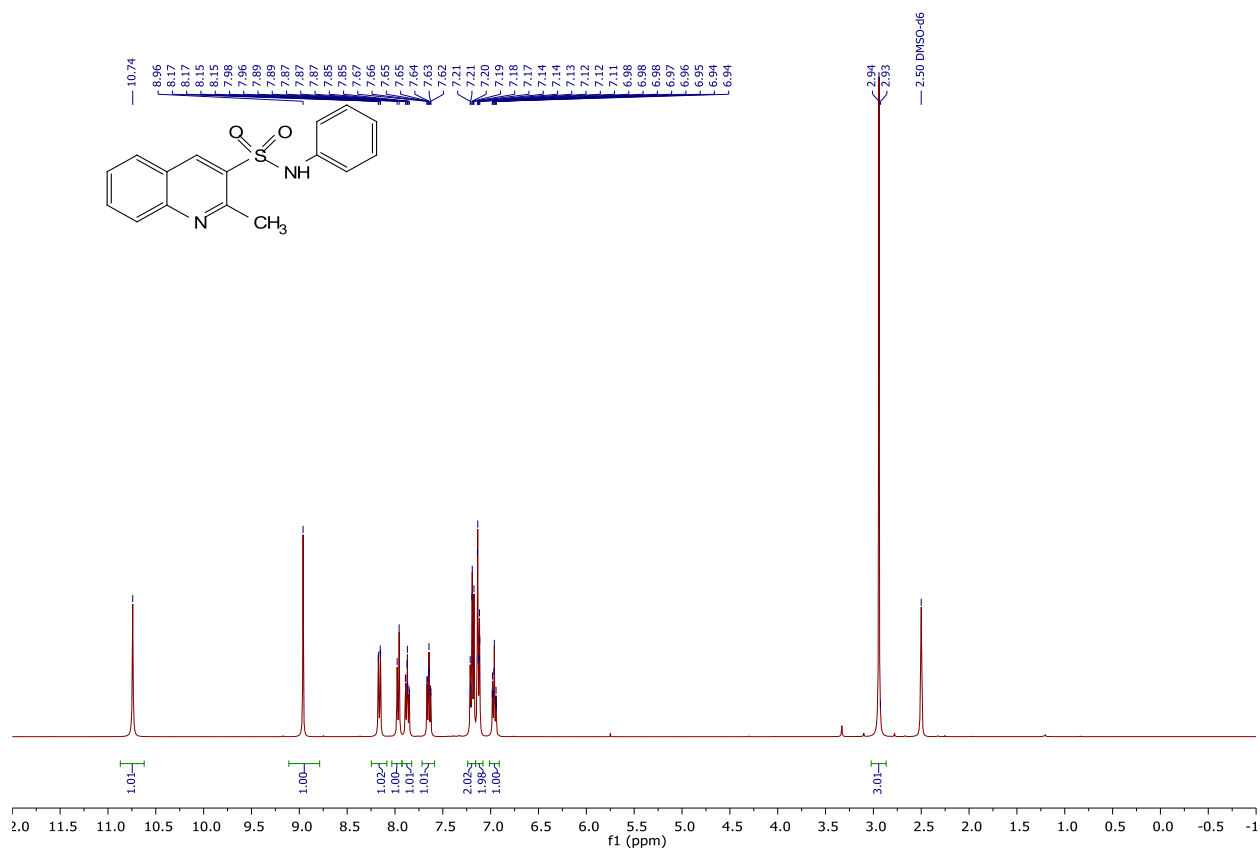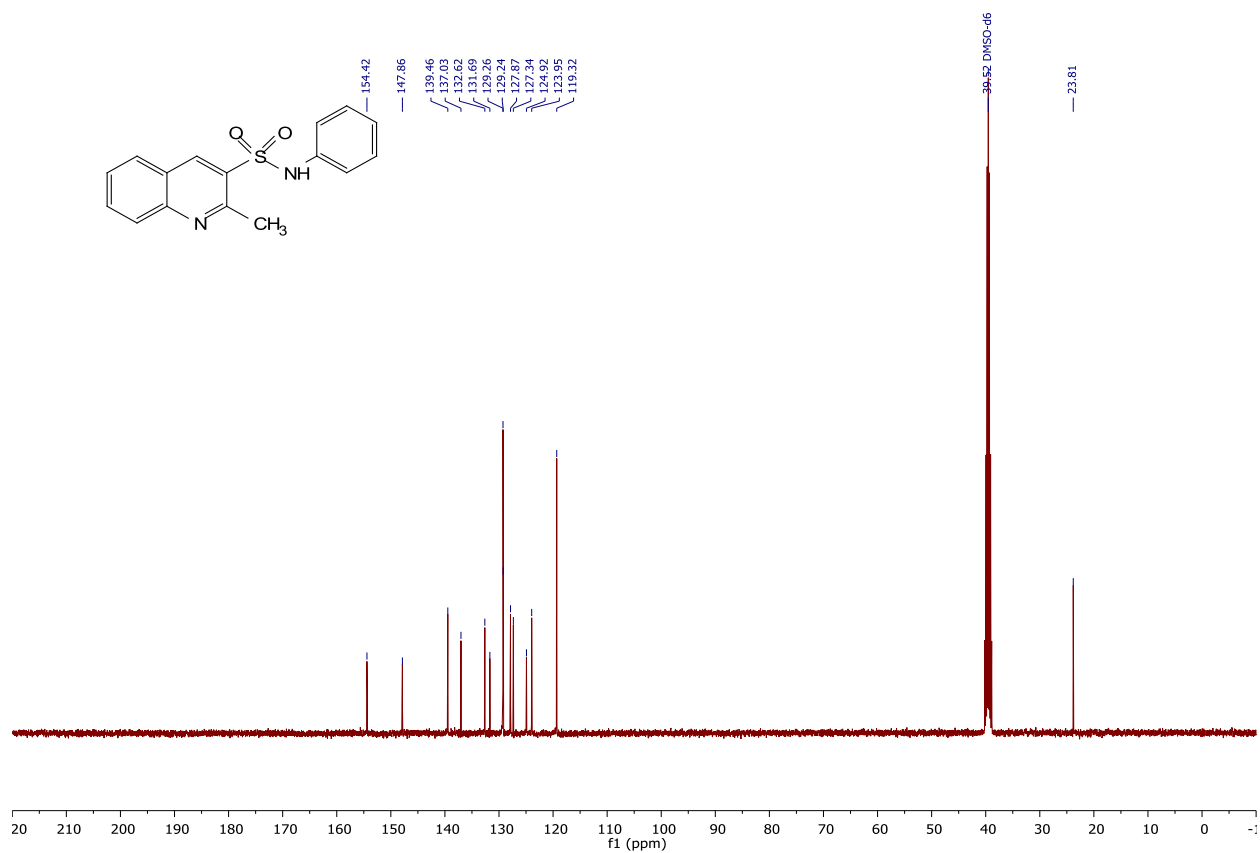

Copies of  $^1\text{H}$  (400.13 MHz,  $\text{DMSO-}d_6$ ) and  $^{13}\text{C}\{^1\text{H}\}$  (100.61 MHz,  $\text{DMSO-}d_6$ ) of **5j**

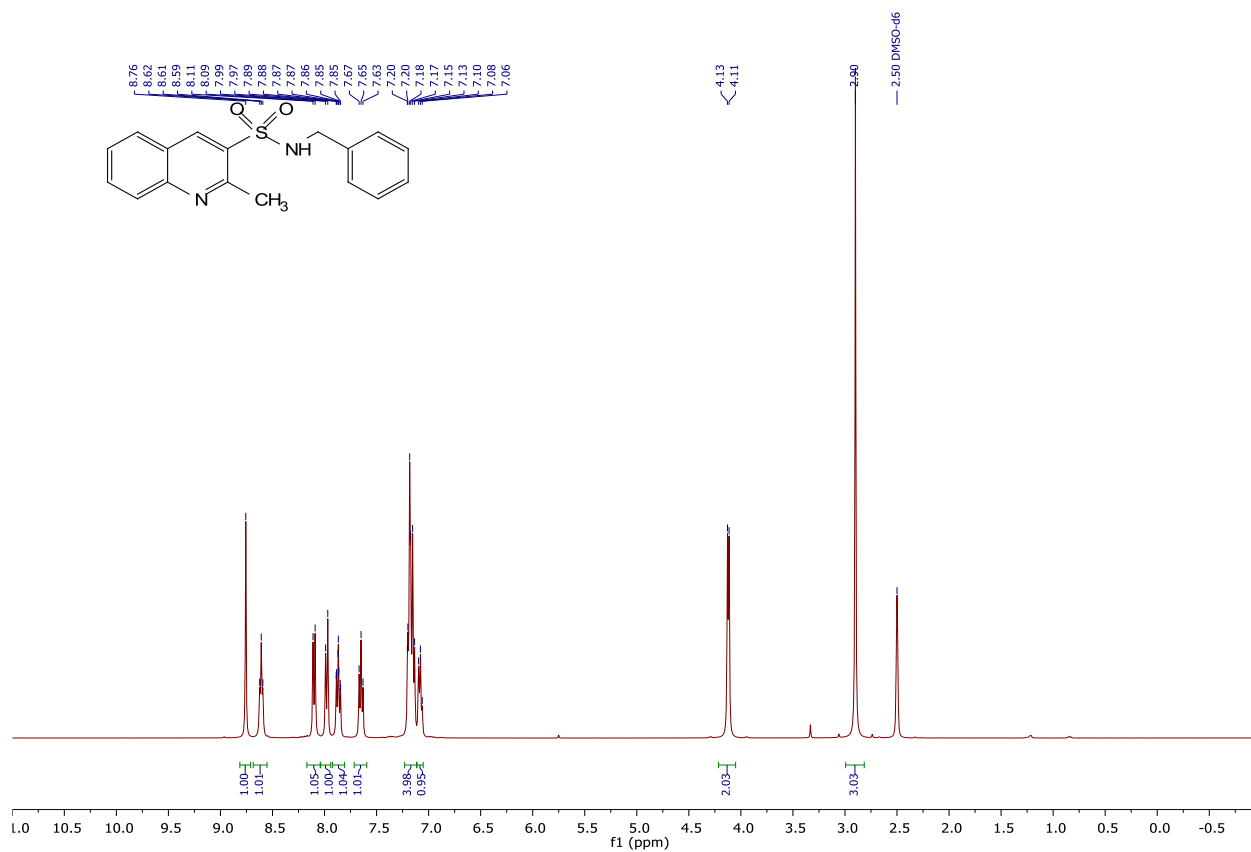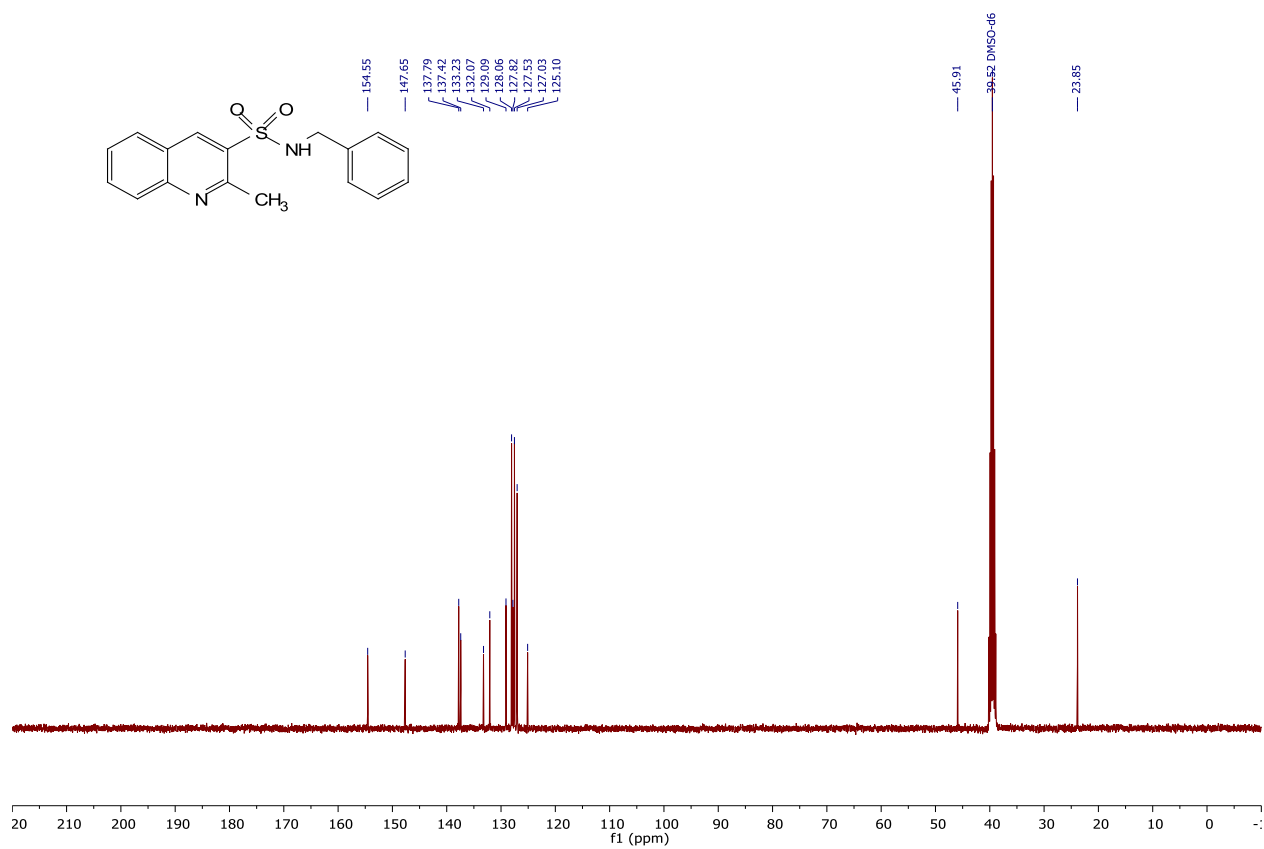

Copies of  $^1\text{H}$  (400.13 MHz,  $\text{CDCl}_3$ ) and  $^{13}\text{C}\{^1\text{H}\}$  (100.61 MHz,  $\text{CDCl}_3$ ) of **5k**

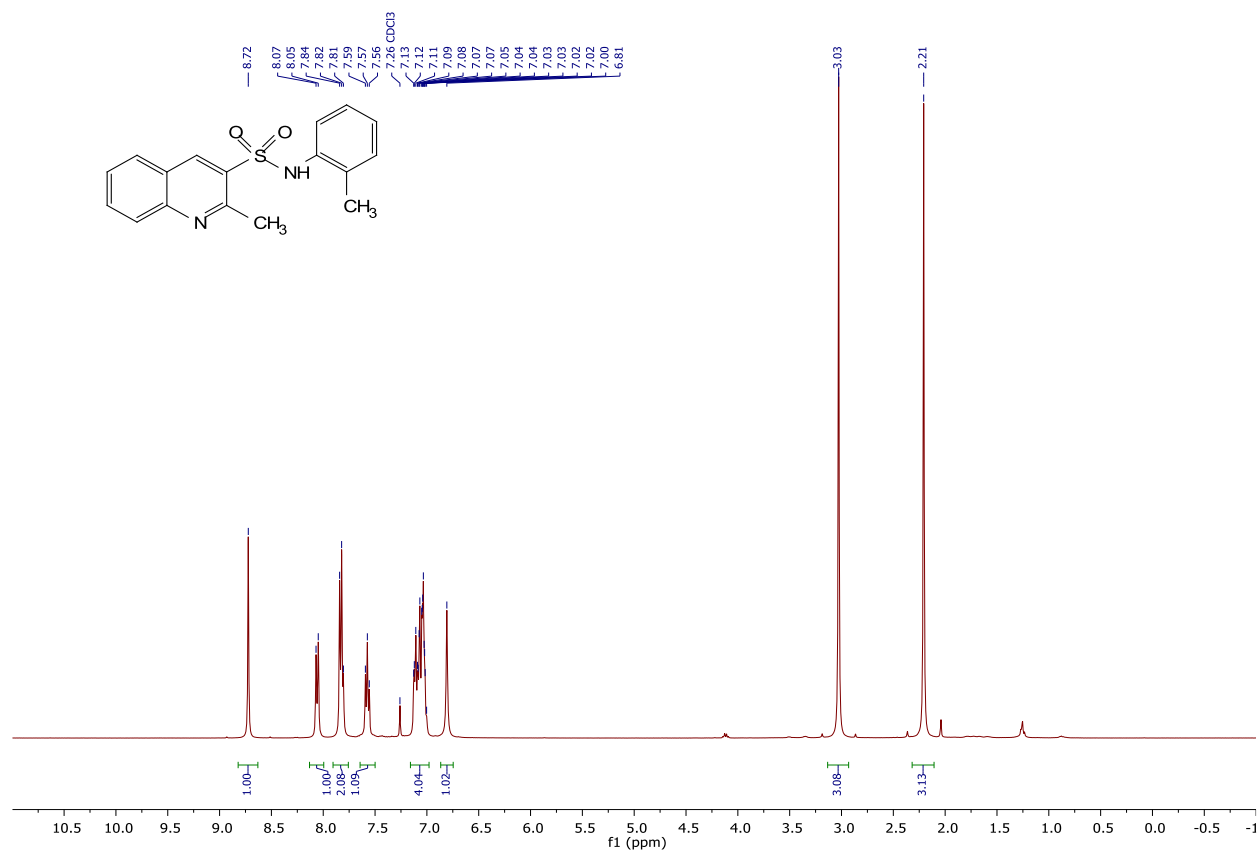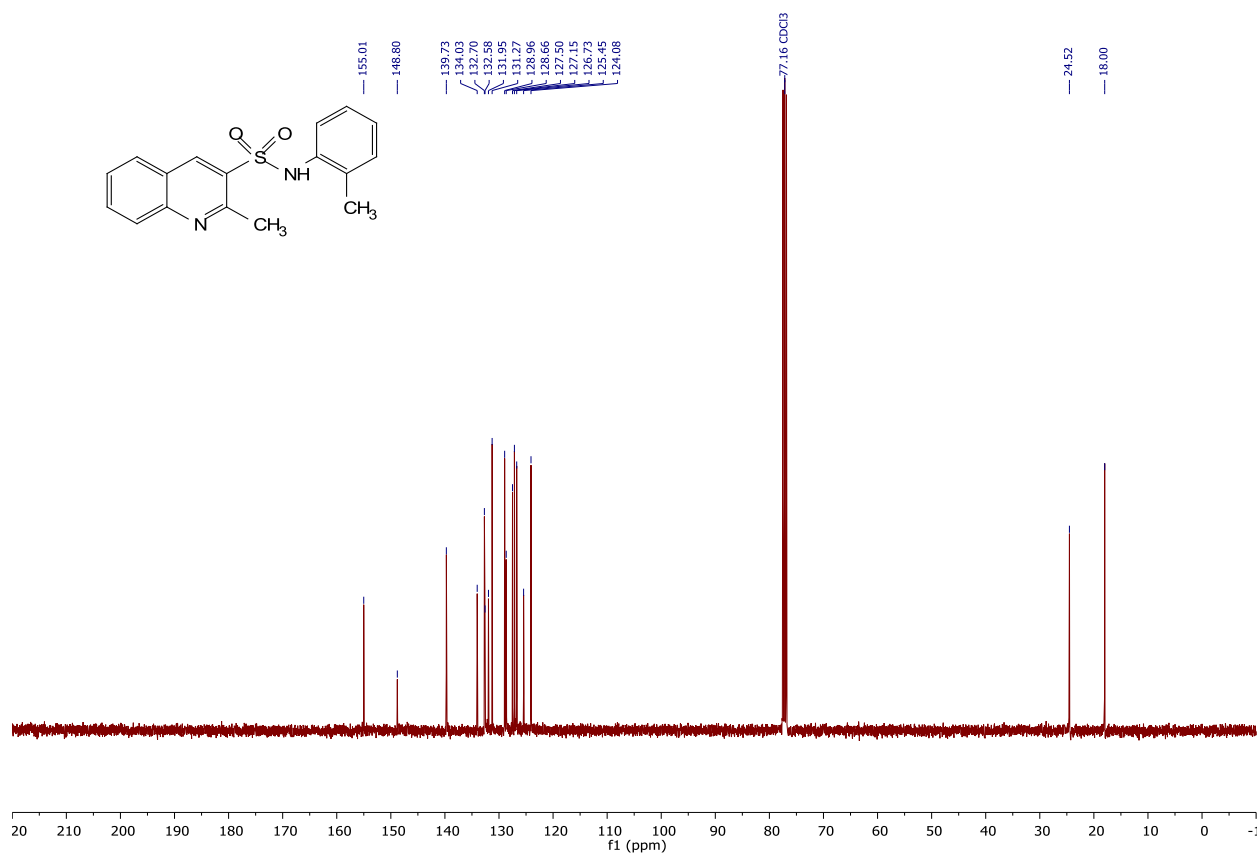



Copies of  $^1\text{H}$  (400.13 MHz,  $\text{DMSO-}d_6$ ) and  $^{13}\text{C}$  { $^1\text{H}$ } (100.61 MHz,  $\text{DMSO-}d_6$ ) of **51**

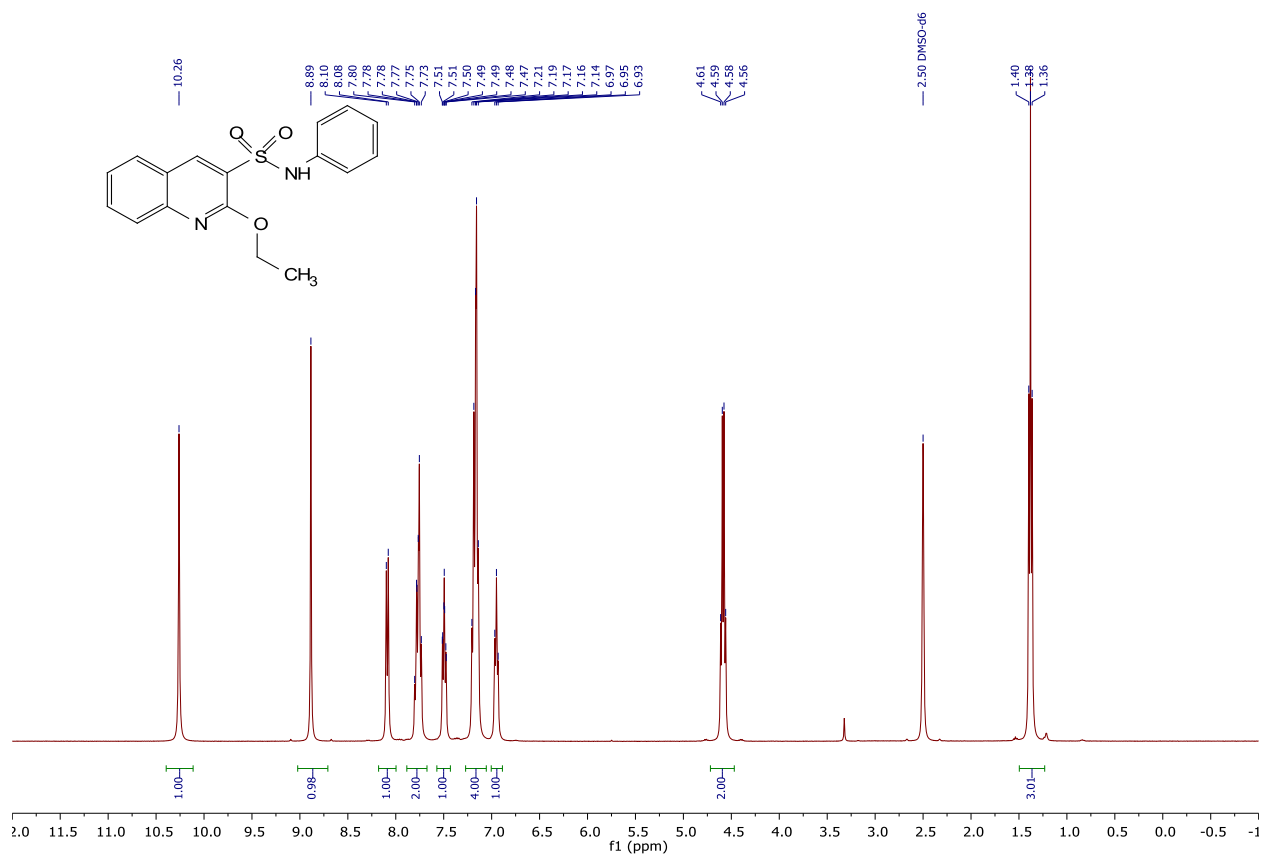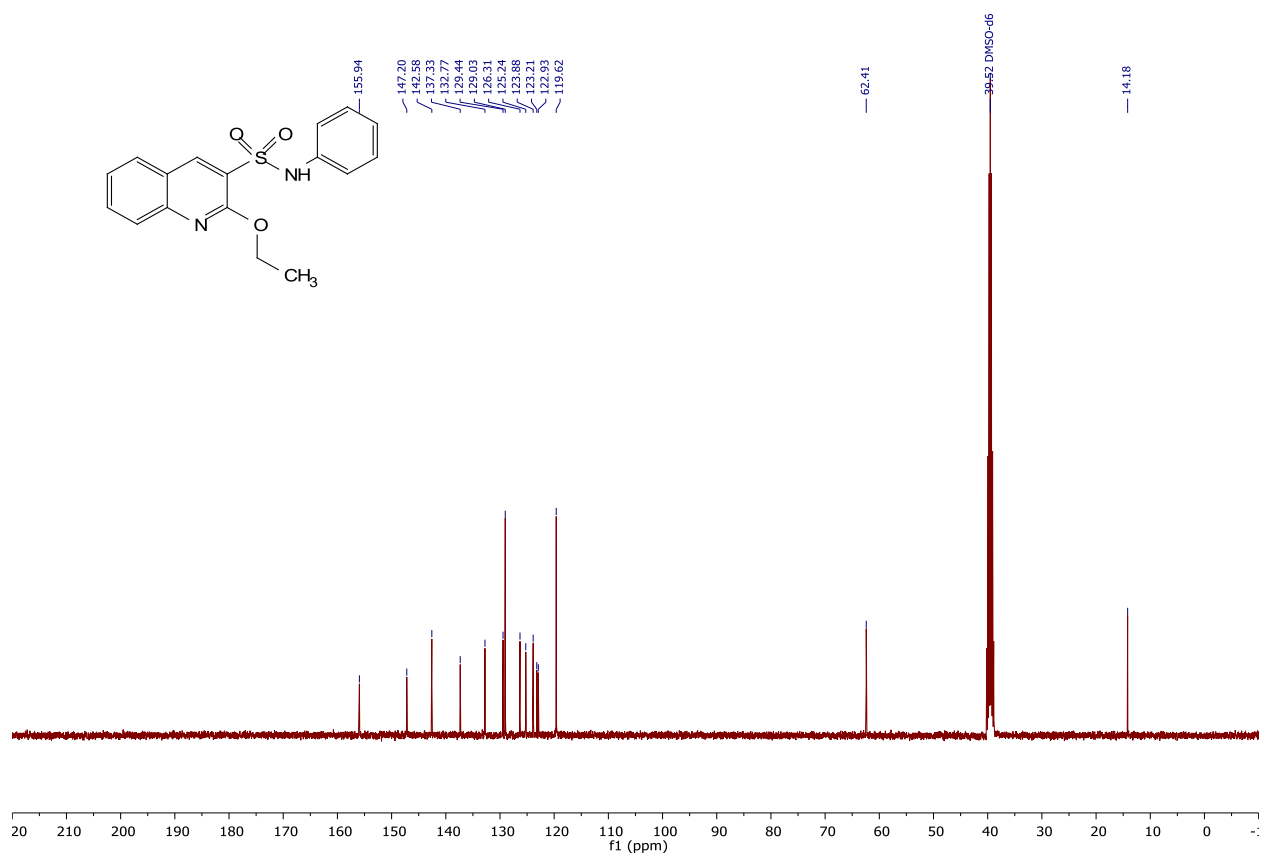

Copies of  $^1\text{H}$  (400.13 MHz,  $\text{CDCl}_3$ ) and  $^{13}\text{C}\{^1\text{H}\}$  (100.61 MHz,  $\text{CDCl}_3$ ) of **5m**

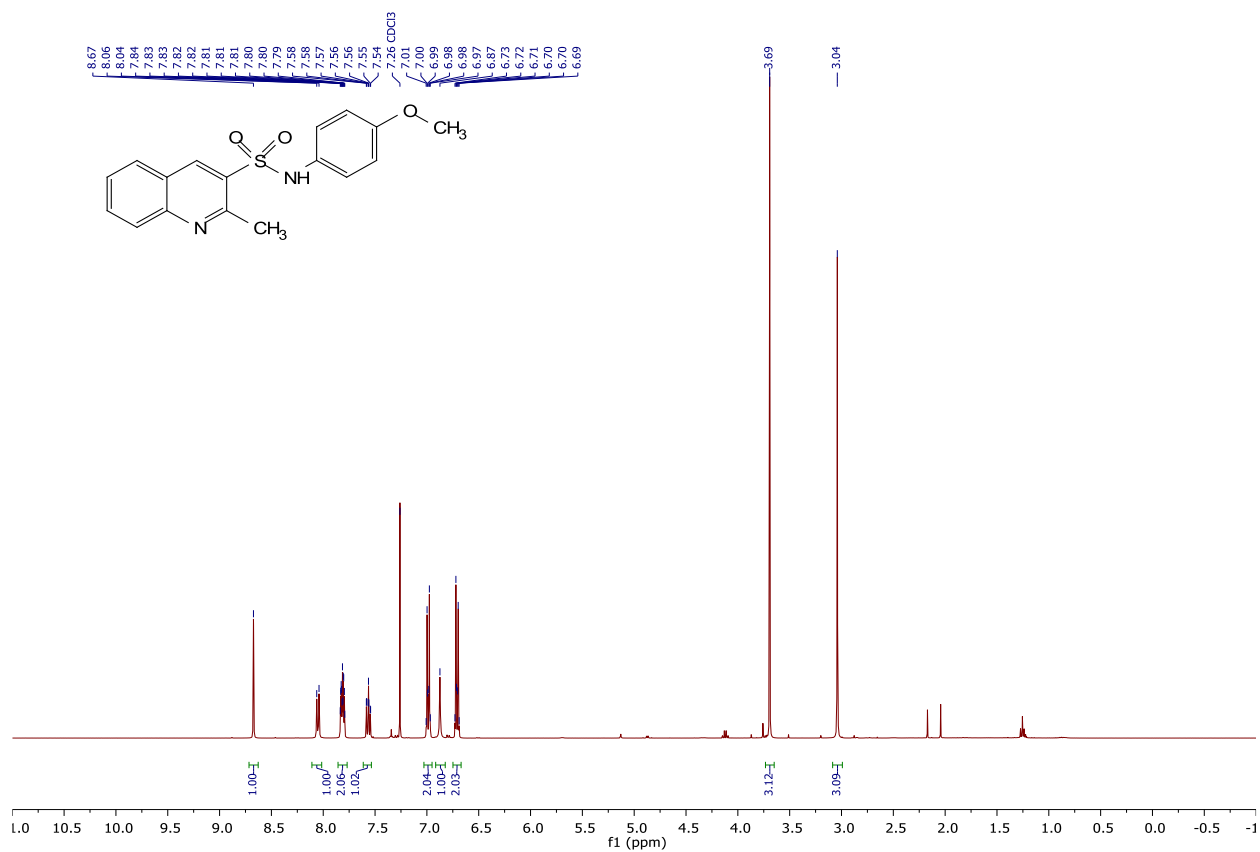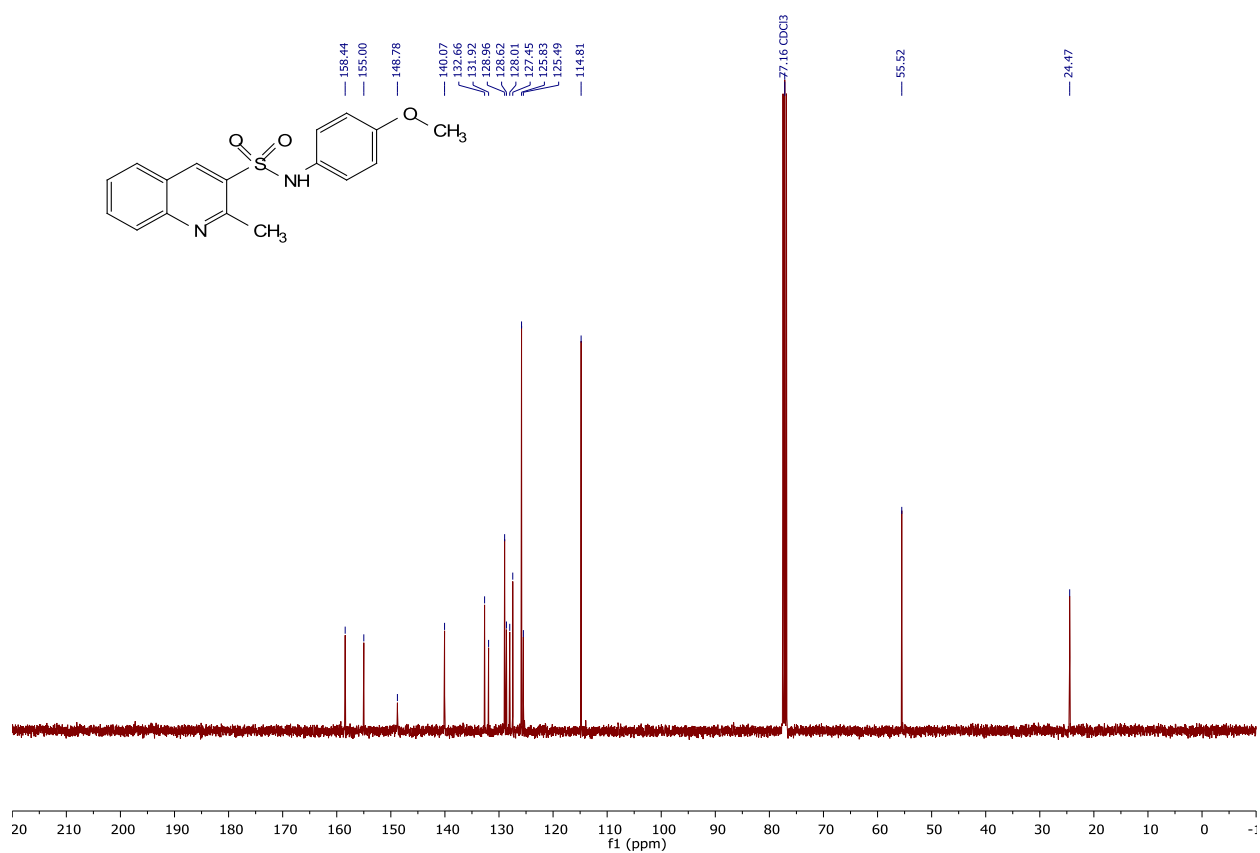

Copies of  $^1\text{H}$  (400.13 MHz,  $\text{CDCl}_3$ ) and  $^{13}\text{C}\{^1\text{H}\}$  (100.61 MHz,  $\text{CDCl}_3$ ) of **5n**

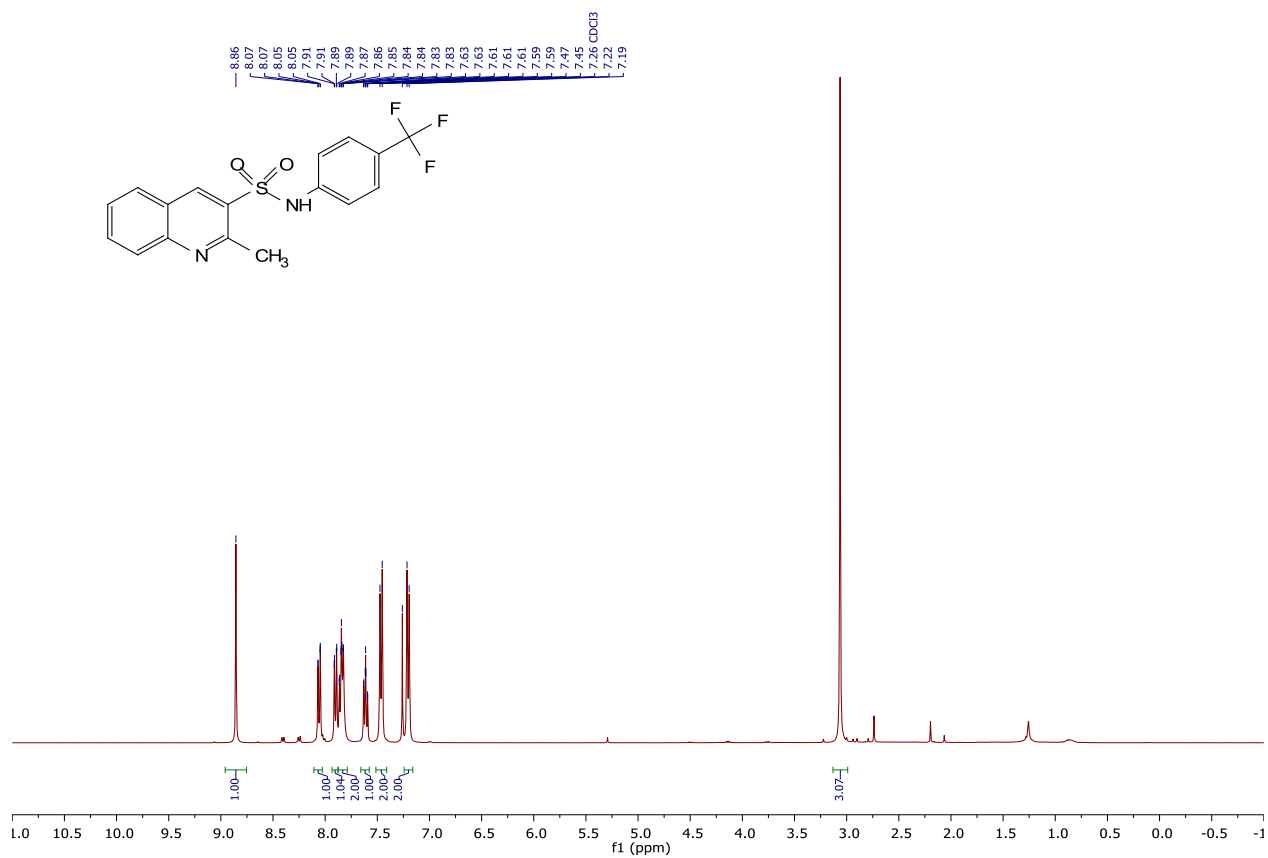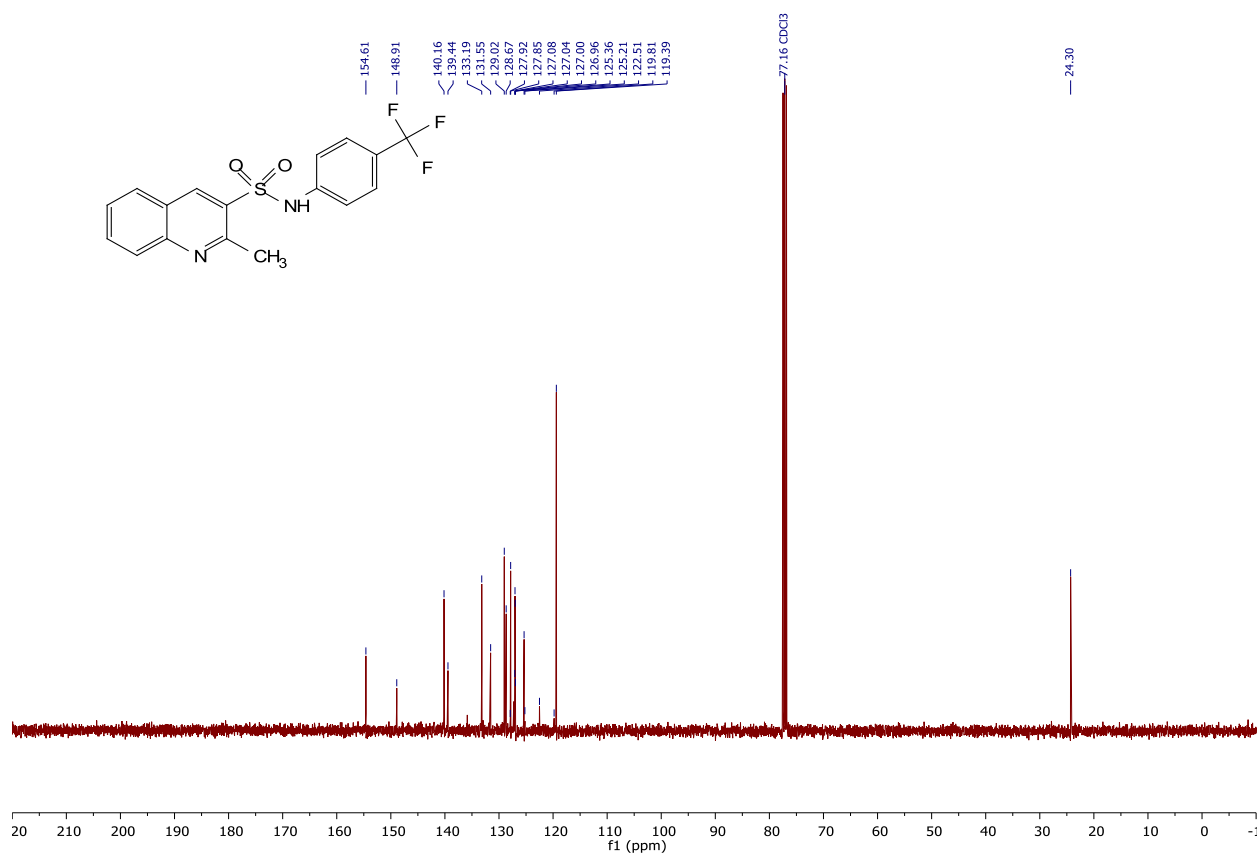

Copy of  $^{19}\text{F}\{^1\text{H}\}$  (376.50 MHz,  $\text{CDCl}_3$ ) spectrum of **5n**

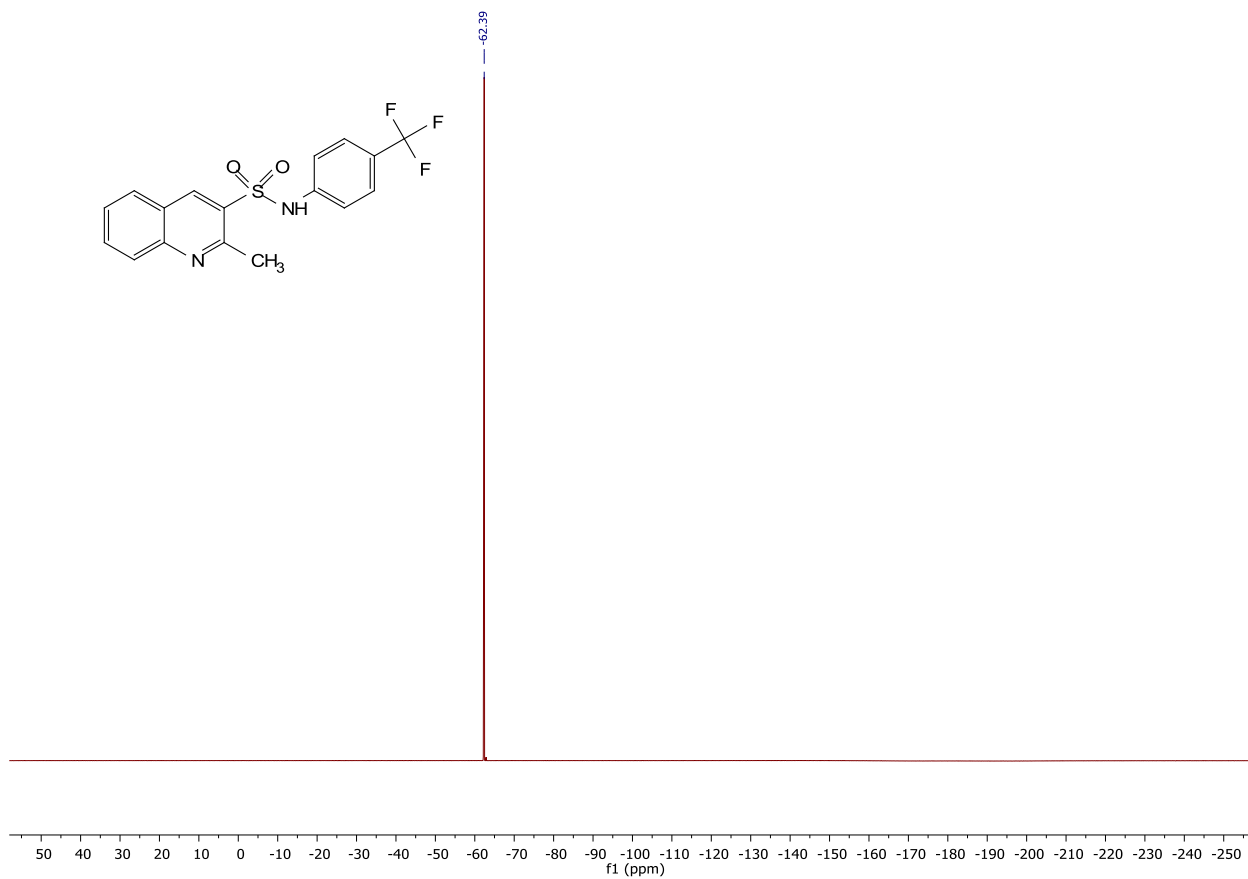

Copies of  $^1\text{H}$  (400.13 MHz,  $\text{CDCl}_3$ ) and  $^{13}\text{C}\{^1\text{H}\}$  (100.61 MHz,  $\text{CDCl}_3$ ) of **5o**

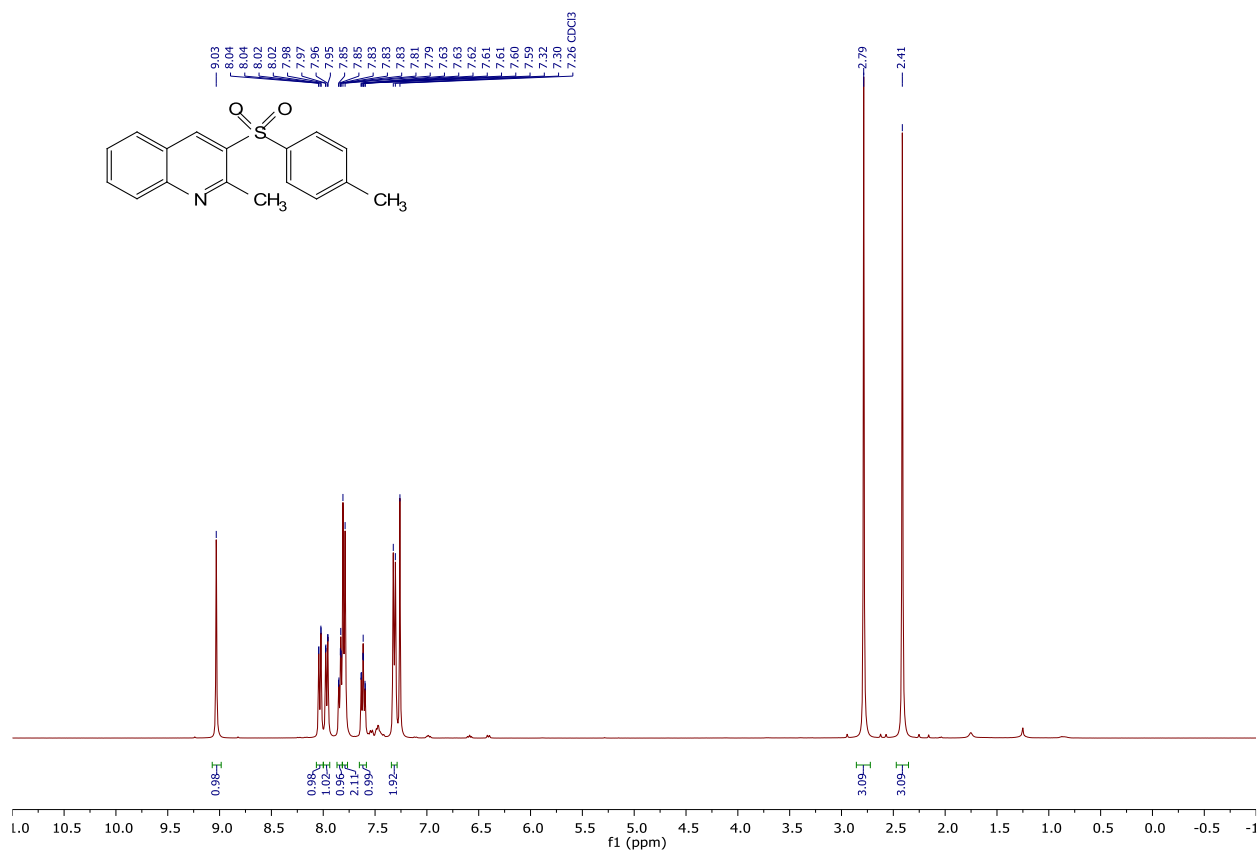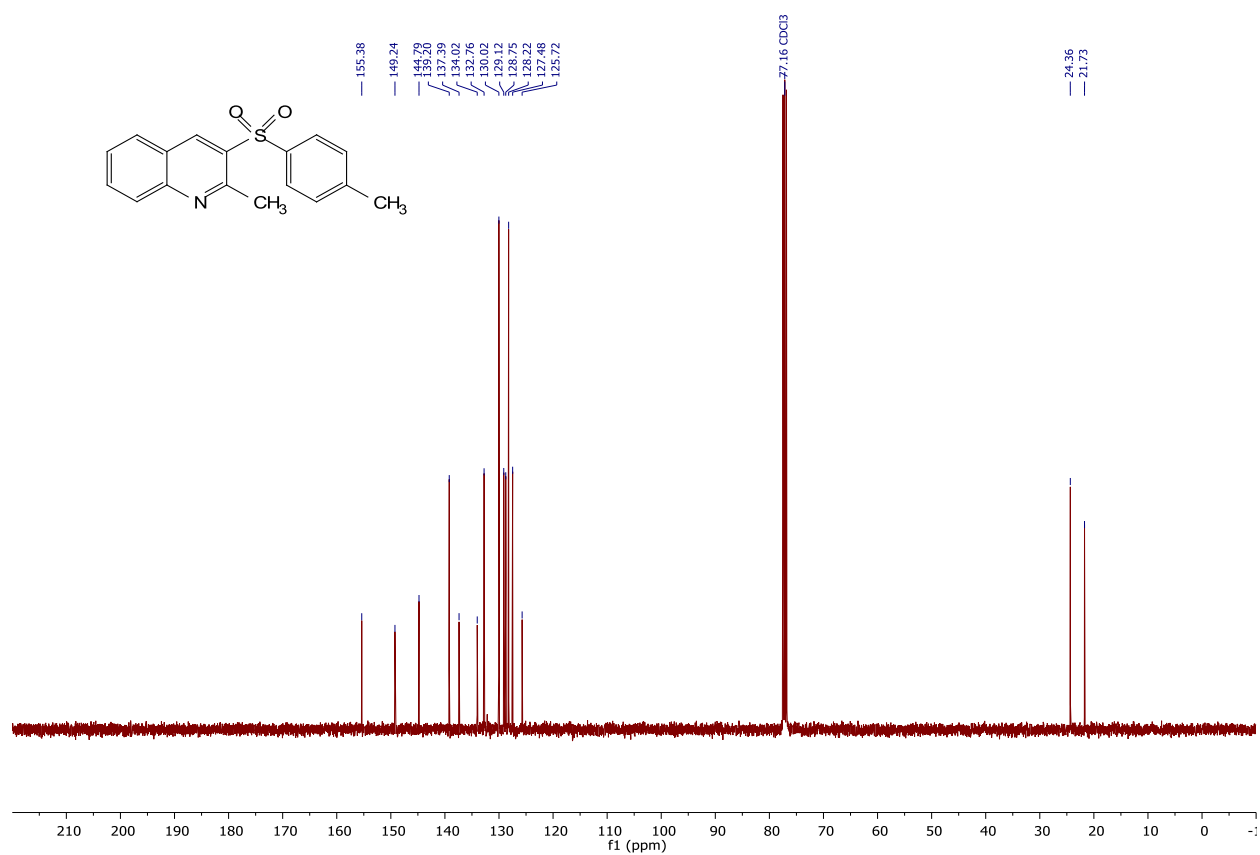



Copies of  $^1\text{H}$  (400.13 MHz,  $\text{CDCl}_3$ ) and  $^{13}\text{C}\{^1\text{H}\}$  (100.61 MHz,  $\text{CDCl}_3$ ) of **5q**

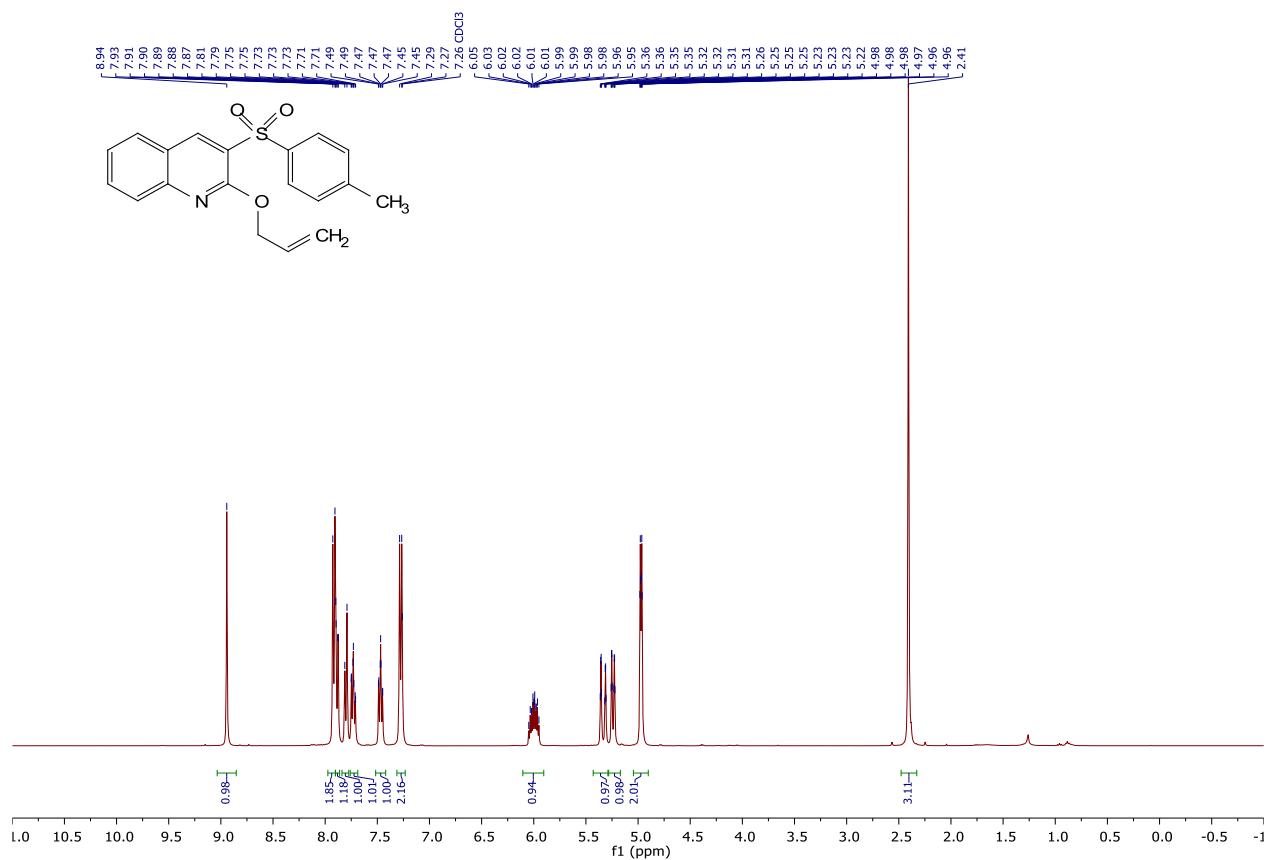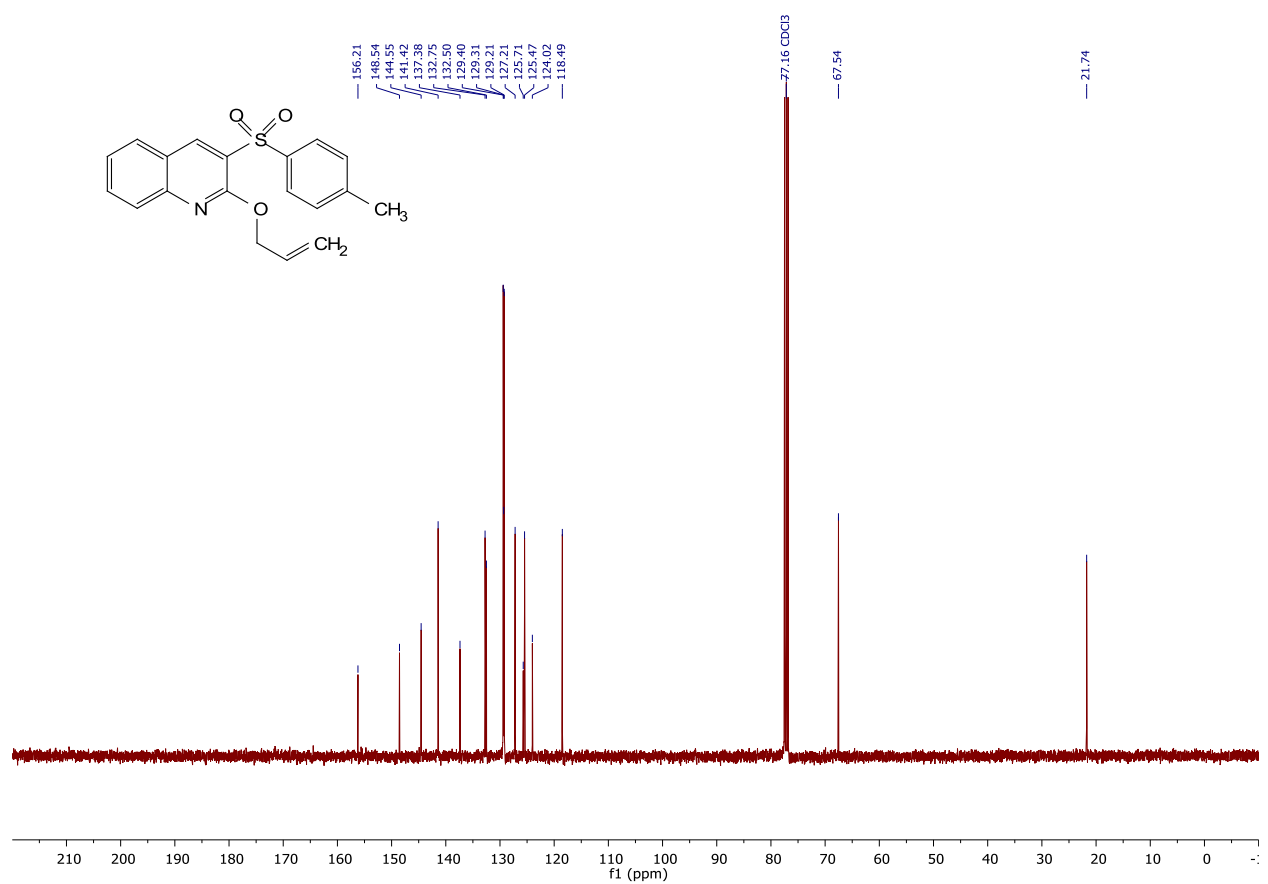

## VI. X-ray crystallographic data

Crystallographic data for compound **5a**. X-ray Single Crystal Analysis was performed on a SuperNova diffractometer. Crystal was kept at 100(2) K during data collection. Using Olex2 [11], the structure was solved with the SHELXT [12] structure solution program using Intrinsic Phasing and refined with the SHELXL [13] refinement package using Least Squares minimization.

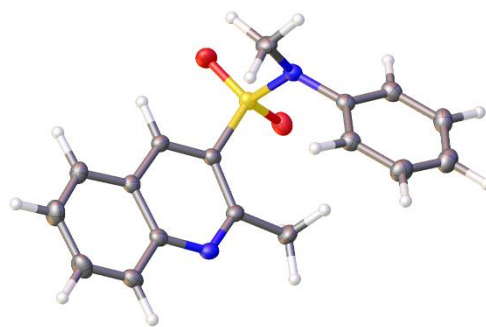

**Figure S1.** ORTEP representation of compound **5a** (thermal ellipsoids are shown at 50% probability).

| <b>Table S1.</b> Crystal data and structure refinement for <b>5a</b> |                                                                 |
|----------------------------------------------------------------------|-----------------------------------------------------------------|
| <b>CCDC</b>                                                          | <b>2242072</b>                                                  |
| Empirical formula                                                    | C <sub>17</sub> H <sub>16</sub> N <sub>2</sub> O <sub>2</sub> S |
| Formula weight                                                       | 312.38                                                          |
| Temperature/K                                                        | 100(2)                                                          |
| Crystal system                                                       | monoclinic                                                      |
| Space group                                                          | P2 <sub>1</sub> /n                                              |
| a/Å                                                                  | 8.3096(2)                                                       |
| b/Å                                                                  | 5.71690(10)                                                     |
| c/Å                                                                  | 31.2551(6)                                                      |
| α/°                                                                  | 90                                                              |
| β/°                                                                  | 93.640(2)                                                       |
| γ/°                                                                  | 90                                                              |
| Volume/Å <sup>3</sup>                                                | 1481.78(5)                                                      |
| Z                                                                    | 4                                                               |
| ρ <sub>calc</sub> /cm <sup>3</sup>                                   | 1.4                                                             |
| μ/mm <sup>-1</sup>                                                   | 2.015                                                           |
| F(000)                                                               | 656                                                             |
| Crystal size/mm <sup>3</sup>                                         | 0.4 × 0.06 × 0.02                                               |
| Radiation                                                            | Cu Kα (λ = 1.54184)                                             |
| 2θ range for data collection/°                                       | 5.666 to 151.92                                                 |
| Index ranges                                                         | -9 ≤ h ≤ 10, -6 ≤ k ≤ 7, -39 ≤ l ≤ 39                           |
| Reflections collected                                                | 8474                                                            |
| Independent reflections                                              | 2941 [R <sub>int</sub> = 0.0469, R <sub>sigma</sub> = 0.0414]   |
| Data/restraints/parameters                                           | 2941/0/201                                                      |
| Goodness-of-fit on F <sup>2</sup>                                    | 1.055                                                           |
| Final R indexes [I >= 2σ (I)]                                        | R <sub>1</sub> = 0.0472, wR <sub>2</sub> = 0.1283               |
| Final R indexes [all data]                                           | R <sub>1</sub> = 0.0529, wR <sub>2</sub> = 0.1316               |
| Largest diff. peak/hole / e Å <sup>-3</sup>                          | 0.33/-0.55                                                      |



## VII. References

1. Malkova, K.; Bubyrev, A.; Krivovicheva, V.; Dar'in, D.; Bunev, A.; Krasavin, M. *Beilstein J. Org. Chem.* **2022**, *18*, 1636-1641.
2. Sabatié, A.; Végh, D.; Loupy, A.; Floch, L. u. *Arkivoc* **2001**, *2001* (6), 122-128.
3. Becher, J.; Begtrup, M.; Gjerløv, A.; Larsen, S.; Dehaen, W.; Christensen, L.; Napoli, A.; Sindona, G.; Aksnes, D.; Francis, G.; Aaberg, A. *Acta Chem. Scand.* **1995**, *49*, 57-63.
4. Bubyrev, A.; Dar'in, D.; Kantin, G.; Krasavin, M. *Eur. J. Org. Chem.* **2020**, *2020* (27), 4112-4115.
5. Klochkova, A.; Bubyrev, A.; Dar'in, D.; Bakulina, O.; Krasavin, M.; Sokolov, V. *Synthesis* **2021**, *53* (10), 1795-1804.
6. Swenson, R. E.; Sowin, T. J.; Zhang, H. Q. *J. Org. Chem.* **2002**, *67* (26), 9182-9185.
7. Bubyrev, A.; Malkova, K.; Kantin, G.; Dar'in, D.; Krasavin, M. *J. Org. Chem.* **2021**, *86* (23), 17516-17522.
8. Chen, C.-C.; Ho, J.-C.; Chang, N.-C. *Tetrahedron* **2008**, *64* (45), 10350-10354.
9. Ma, H.; Liu, S.; Zhu, S.; Bi, W.; Chen, X.; Zhao, Y. *Phosphorus Sulfur Silicon Relat. Elem.* **2017**, *192* (8), 887-895.
10. Wang, F.; Xu, P.; Wang, S.-Y.; Ji, S.-J. *Org. Lett.* **2018**, *20* (8), 2204-2207.
11. Dolomanov, O. V.; Bourhis, L. J.; Gildea, R. J.; Howard, J. A. K.; Puschmann, H. *J. Appl. Crystallogr.* **2009**, *42* (2), 339-341.
12. Sheldrick, G. *Acta Crystallogr. A* **2015**, *71* (1), 3-8.
13. Sheldrick, G. *Acta Crystallogr. C* **2015**, *71* (1), 3-8.
